# Supplementary material for: Toxicity of nanoplastics: machine learning combined with meta-analysis
Source: Royal Society of Chemistry journal article supplement (doi:10.1039/d5nh00024f), 2025-01-01
Supplement: d5nh00024f7.xlsx [file d5nh00024f7.xlsx]

## Sheet: Sheet1
RR	cell_type	system	exposure_type	polymer_type	size	concentration	exposure_time	gender	endpoints1
-0.0980014	P	nervous	parenteral	PS	23	34	3	male	the total distance moved (OFT)
0.0116823	P	nervous	parenteral	PS	23	34000	3	male	the total distance moved (OFT)
-0.555095	P	nervous	parenteral	PS	23	34	3	male	GSH
-0.425601	P	nervous	parenteral	PS	23	34000	3	male	GSH
0.220726	P	nervous	parenteral	PS	23	34	3	male	MDA
-0.208863	P	nervous	parenteral	PS	23	34000	3	male	MDA
0.00835797	P	nervous	parenteral	PS	23	34	3	male	AChE activity
0.134579	P	nervous	parenteral	PS	23	34000	3	male	AChE activity
-0.0393695	P	body	oral	PS	100	1000	3	female	placenta weight
0.0365577	P	body	oral	PS	100	10000	3	female	placenta weight
0.0173925	P	body	oral	PS	100	1000	3	unknown	fetus weight
-0.171844	P	body	oral	PS	100	10000	3	unknown	fetus weight
0.499943	L	immune	culture medium	PS	100	10	1	male	fluorescent intensity
0.623056	L	immune	culture medium	PS	100	20	1	male	fluorescent intensity
1.17498	L	immune	culture medium	PS	100	50	1	male	fluorescent intensity
1.82039	L	immune	culture medium	PS	100	100	1	male	fluorescent intensity
0.557296	L	immune	culture medium	PS-COOH	100	10	1	male	fluorescent intensity
0.689595	L	immune	culture medium	PS-COOH	100	20	1	male	fluorescent intensity
1.22413	L	immune	culture medium	PS-COOH	100	50	1	male	fluorescent intensity
1.88384	L	immune	culture medium	PS-COOH	100	100	1	male	fluorescent intensity
1.36798	L	immune	culture medium	PS-NH2	100	10	1	male	fluorescent intensity
1.49056	L	immune	culture medium	PS-NH2	100	20	1	male	fluorescent intensity
1.90572	L	immune	culture medium	PS-NH2	100	50	1	male	fluorescent intensity
2.14434	L	immune	culture medium	PS-NH2	100	100	1	male	fluorescent intensity
-0.00769642	L	immune	culture medium	PS	100	10	1	male	cell viability
-0.0155069	L	immune	culture medium	PS	100	20	1	male	cell viability
-0.0397591	L	immune	culture medium	PS	100	50	1	male	cell viability
-0.00769642	L	immune	culture medium	PS	100	100	1	male	cell viability
-0.0309144	L	immune	culture medium	PS-COOH	100	10	1	male	cell viability
-0.0725116	L	immune	culture medium	PS-COOH	100	20	1	male	cell viability
-0.0981256	L	immune	culture medium	PS-COOH	100	50	1	male	cell viability
-0.142149	L	immune	culture medium	PS-COOH	100	100	1	male	cell viability
-0.250259	L	immune	culture medium	PS-NH2	100	1	1	male	cell viability
-1.26396	L	immune	culture medium	PS-NH2	100	2	1	male	cell viability
-3.25265	L	immune	culture medium	PS-NH2	100	5	1	male	cell viability
-3.08135	L	immune	culture medium	PS-NH2	100	10	1	male	cell viability
0.247121	L	immune	culture medium	PS	100	10	1	male	ROS
0.289319	L	immune	culture medium	PS	100	20	1	male	ROS
0.217825	L	immune	culture medium	PS	100	50	1	male	ROS
0.243951	L	immune	culture medium	PS	100	100	1	male	ROS
0.2464	L	immune	culture medium	PS-COOH	100	10	1	male	ROS
0.25961	L	immune	culture medium	PS-COOH	100	20	1	male	ROS
0.30838	L	immune	culture medium	PS-COOH	100	50	1	male	ROS
0.349268	L	immune	culture medium	PS-COOH	100	100	1	male	ROS
0.285681	L	immune	culture medium	PS-NH2	100	10	1	male	ROS
0.769599	L	immune	culture medium	PS-NH2	100	20	1	male	ROS
1.1998	L	immune	culture medium	PS-NH2	100	50	1	male	ROS
3.13821	L	immune	culture medium	PS-NH2	100	100	1	male	ROS
-0.106708	L	immune	culture medium	PS	100	10	1	male	genes expression (promoting apoptosis and necrocytosis)
-0.0177191	L	immune	culture medium	PS	100	20	1	male	genes expression (promoting apoptosis and necrocytosis)
-0.136884	L	immune	culture medium	PS	100	50	1	male	genes expression (promoting apoptosis and necrocytosis)
0.150172	L	immune	culture medium	PS-COOH	100	10	1	male	genes expression (promoting apoptosis and necrocytosis)
0.597052	L	immune	culture medium	PS-COOH	100	20	1	male	genes expression (promoting apoptosis and necrocytosis)
0.986152	L	immune	culture medium	PS-COOH	100	50	1	male	genes expression (promoting apoptosis and necrocytosis)
-0.0958077	L	immune	culture medium	PS-NH2	100	10	1	male	genes expression (promoting apoptosis and necrocytosis)
0.777347	L	immune	culture medium	PS-NH2	100	20	1	male	genes expression (promoting apoptosis and necrocytosis)
1.03309	L	immune	culture medium	PS-NH2	100	50	1	male	genes expression (promoting apoptosis and necrocytosis)
0.0294708	L	immune	culture medium	PS	100	10	1	male	genes expression (promoting apoptosis and necrocytosis)
-0.102734	L	immune	culture medium	PS	100	20	1	male	genes expression (promoting apoptosis and necrocytosis)
-0.2428	L	immune	culture medium	PS	100	50	1	male	genes expression (promoting apoptosis and necrocytosis)
0.406488	L	immune	culture medium	PS-COOH	100	10	1	male	genes expression (promoting apoptosis and necrocytosis)
0.60089	L	immune	culture medium	PS-COOH	100	20	1	male	genes expression (promoting apoptosis and necrocytosis)
0.963802	L	immune	culture medium	PS-COOH	100	50	1	male	genes expression (promoting apoptosis and necrocytosis)
-0.043273	L	immune	culture medium	PS-NH2	100	10	1	male	genes expression (promoting apoptosis and necrocytosis)
4.62e-07	L	immune	culture medium	PS-NH2	100	20	1	male	genes expression (promoting apoptosis and necrocytosis)
0.503912	L	immune	culture medium	PS-NH2	100	50	1	male	genes expression (promoting apoptosis and necrocytosis)
0.110765	L	immune	culture medium	PS	100	10	1	male	cell apoptosis
0.12525	L	immune	culture medium	PS	100	20	1	male	cell apoptosis
0.134877	L	immune	culture medium	PS	100	50	1	male	cell apoptosis
0.0919764	L	immune	culture medium	PS	100	100	1	male	cell apoptosis
0.0725366	L	immune	culture medium	PS-COOH	100	10	1	male	cell apoptosis
0.299437	L	immune	culture medium	PS-COOH	100	20	1	male	cell apoptosis
0.342372	L	immune	culture medium	PS-COOH	100	50	1	male	cell apoptosis
0.403122	L	immune	culture medium	PS-COOH	100	100	1	male	cell apoptosis
0.878552	L	immune	culture medium	PS-NH2	100	10	1	male	cell apoptosis
1.53603	L	immune	culture medium	PS-NH2	100	20	1	male	cell apoptosis
1.90494	L	immune	culture medium	PS-NH2	100	50	1	male	cell apoptosis
2.1355	L	immune	culture medium	PS-NH2	100	100	1	male	cell apoptosis
-0.0983911	P	reproductive	inhalant and nasal	PS	80	25000000	3	female	placenta weight
-0.352349	P	body	inhalant and nasal	PS	80	25000000	3	female	fetus weight
-0.000561663	P	reproductive	inhalant and nasal	PS	80	25000000	3	male	placenta weight
-0.0890076	P	body	inhalant and nasal	PS	80	25000000	3	male	fetus weight
0.686142	P	digestive	inhalant and nasal	PS	80	1000000	3	female	genes expression (lipid metabolism)
0.636842	P	digestive	inhalant and nasal	PS	80	5000000	3	female	genes expression (lipid metabolism)
0.842473	P	digestive	inhalant and nasal	PS	80	25000000	3	female	genes expression (lipid metabolism)
-0.00197672	P	digestive	inhalant and nasal	PS	80	1000000	3	male	genes expression (lipid metabolism)
0.400523	P	digestive	inhalant and nasal	PS	80	5000000	3	male	genes expression (lipid metabolism)
0.512201	P	digestive	inhalant and nasal	PS	80	25000000	3	male	genes expression (lipid metabolism)
1.11317	P	digestive	inhalant and nasal	PS	80	1000000	3	female	genes expression (lipid metabolism)
0.82444	P	digestive	inhalant and nasal	PS	80	5000000	3	female	genes expression (lipid metabolism)
0.550757	P	digestive	inhalant and nasal	PS	80	25000000	3	female	genes expression (lipid metabolism)
1.62665	P	digestive	inhalant and nasal	PS	80	1000000	3	male	genes expression (lipid metabolism)
1.48058	P	digestive	inhalant and nasal	PS	80	5000000	3	male	genes expression (lipid metabolism)
1.8363	P	digestive	inhalant and nasal	PS	80	25000000	3	male	genes expression (lipid metabolism)
1.11771	P	digestive	inhalant and nasal	PS	80	1000000	3	female	genes expression (lipid metabolism)
0.841022	P	digestive	inhalant and nasal	PS	80	5000000	3	female	genes expression (lipid metabolism)
1.44841	P	digestive	inhalant and nasal	PS	80	25000000	3	female	genes expression (lipid metabolism)
0.427369	P	digestive	inhalant and nasal	PS	80	1000000	3	male	genes expression (lipid metabolism)
0.834255	P	digestive	inhalant and nasal	PS	80	5000000	3	male	genes expression (lipid metabolism)
0.760744	P	digestive	inhalant and nasal	PS	80	25000000	3	male	genes expression (lipid metabolism)
-0.0158848	P	body	inhalant and nasal	PS	80	1000000	3	female	fetus weight
-0.212635	P	body	inhalant and nasal	PS	80	5000000	3	female	fetus weight
-0.341056	P	body	inhalant and nasal	PS	80	25000000	3	female	fetus weight
-0.0138593	P	body	inhalant and nasal	PS	80	1000000	3	male	fetus weight
0.0416201	P	body	inhalant and nasal	PS	80	5000000	3	male	fetus weight
-0.0341671	P	body	inhalant and nasal	PS	80	25000000	3	male	fetus weight
0.287304	P	body	inhalant and nasal	PS	80	1000000	3	female	body weight
0	P	body	inhalant and nasal	PS	80	5000000	3	female	body weight
0.194581	P	body	inhalant and nasal	PS	80	25000000	3	female	body weight
0.187213	P	body	inhalant and nasal	PS	80	1000000	3	male	body weight
0.031851	P	body	inhalant and nasal	PS	80	5000000	3	male	body weight
-0.0357735	P	body	inhalant and nasal	PS	80	25000000	3	male	body weight
0.0160582	P	digestive	inhalant and nasal	PS	80	1000000	3	female	SOD
-0.0497844	P	digestive	inhalant and nasal	PS	80	5000000	3	female	SOD
-0.0480206	P	digestive	inhalant and nasal	PS	80	25000000	3	female	SOD
0.0334784	P	digestive	inhalant and nasal	PS	80	1000000	3	female	MDA
0.236294	P	digestive	inhalant and nasal	PS	80	5000000	3	female	MDA
0.181886	P	digestive	inhalant and nasal	PS	80	25000000	3	female	MDA
-0.238945	P	digestive	inhalant and nasal	PS	80	1000000	3	female	GSH
-0.0169731	P	digestive	inhalant and nasal	PS	80	5000000	3	female	GSH
-0.048357	P	digestive	inhalant and nasal	PS	80	25000000	3	female	GSH
0	P	digestive	inhalant and nasal	PS	80	1000000	3	male	SOD
0.0614618	P	digestive	inhalant and nasal	PS	80	5000000	3	male	SOD
-0.278005	P	digestive	inhalant and nasal	PS	80	25000000	3	male	SOD
-0.178006	P	digestive	inhalant and nasal	PS	80	1000000	3	male	MDA
0.0324781	P	digestive	inhalant and nasal	PS	80	5000000	3	male	MDA
-0.257305	P	digestive	inhalant and nasal	PS	80	25000000	3	male	MDA
0.194098	P	digestive	inhalant and nasal	PS	80	1000000	3	male	GSH
0.219211	P	digestive	inhalant and nasal	PS	80	5000000	3	male	GSH
-0.487228	P	digestive	inhalant and nasal	PS	80	25000000	3	male	GSH
-0.187158	P	digestive	inhalant and nasal	PS	80	1000000	3	female	SOD
-0.0917541	P	digestive	inhalant and nasal	PS	80	5000000	3	female	SOD
-0.269809	P	digestive	inhalant and nasal	PS	80	25000000	3	female	SOD
0.231337	P	digestive	inhalant and nasal	PS	80	1000000	3	female	MDA
0.178703	P	digestive	inhalant and nasal	PS	80	5000000	3	female	MDA
0.610979	P	digestive	inhalant and nasal	PS	80	25000000	3	female	MDA
-0.013122	P	digestive	inhalant and nasal	PS	80	1000000	3	female	GSH
0.406533	P	digestive	inhalant and nasal	PS	80	5000000	3	female	GSH
-0.0487508	P	digestive	inhalant and nasal	PS	80	25000000	3	female	GSH
0.0642388	P	digestive	inhalant and nasal	PS	80	1000000	3	male	SOD
0.126128	P	digestive	inhalant and nasal	PS	80	5000000	3	male	SOD
0.285812	P	digestive	inhalant and nasal	PS	80	25000000	3	male	SOD
0.778871	P	digestive	inhalant and nasal	PS	80	1000000	3	male	MDA
1.2121	P	digestive	inhalant and nasal	PS	80	5000000	3	male	MDA
0.328142	P	digestive	inhalant and nasal	PS	80	25000000	3	male	MDA
0.266595	P	digestive	inhalant and nasal	PS	80	1000000	3	male	GSH
-0.159428	P	digestive	inhalant and nasal	PS	80	5000000	3	male	GSH
-0.0174936	P	digestive	inhalant and nasal	PS	80	25000000	3	male	GSH
0.104246	P	digestive	inhalant and nasal	PS	80	1000000	3	female	SOD
0.0594001	P	digestive	inhalant and nasal	PS	80	5000000	3	female	SOD
0.198689	P	digestive	inhalant and nasal	PS	80	25000000	3	female	SOD
0.0711552	P	digestive	inhalant and nasal	PS	80	1000000	3	female	MDA
-0.092361	P	digestive	inhalant and nasal	PS	80	5000000	3	female	MDA
0.129885	P	digestive	inhalant and nasal	PS	80	25000000	3	female	MDA
0.0333109	P	digestive	inhalant and nasal	PS	80	1000000	3	female	GSH
-0.0834709	P	digestive	inhalant and nasal	PS	80	5000000	3	female	GSH
-0.121401	P	digestive	inhalant and nasal	PS	80	25000000	3	female	GSH
0.112452	P	digestive	inhalant and nasal	PS	80	1000000	3	male	SOD
0.59701	P	digestive	inhalant and nasal	PS	80	5000000	3	male	SOD
0.131881	P	digestive	inhalant and nasal	PS	80	25000000	3	male	SOD
-0.166259	P	digestive	inhalant and nasal	PS	80	1000000	3	male	MDA
-0.164998	P	digestive	inhalant and nasal	PS	80	5000000	3	male	MDA
-1.06506	P	digestive	inhalant and nasal	PS	80	25000000	3	male	MDA
-0.255407	P	digestive	inhalant and nasal	PS	80	1000000	3	male	GSH
0.466911	P	digestive	inhalant and nasal	PS	80	5000000	3	male	GSH
-0.405531	P	digestive	inhalant and nasal	PS	80	25000000	3	male	GSH
-0.0843791	P	body	parenteral	PS	80	625000	2	male	body weight
-0.112017	P	body	parenteral	PS	80	1250000	2	male	body weight
-0.140508	P	body	parenteral	PS	80	2500000	2	male	body weight
-0.0606216	P	body	parenteral	PS-NH2	80	625000	2	male	body weight
-0.088617	P	body	parenteral	PS-NH2	80	1250000	2	male	body weight
-0.160652	P	body	parenteral	PS-NH2	80	2500000	2	male	body weight
-0.0545216	P	body	parenteral	PS-COOH	80	625000	2	male	body weight
-0.0779879	P	body	parenteral	PS-COOH	80	1250000	2	male	body weight
-0.146039	P	body	parenteral	PS-COOH	80	2500000	2	male	body weight
0.502946	P	circulatory	parenteral	PS	80	625000	2	male	IL-6
1.04851	P	circulatory	parenteral	PS	80	1250000	2	male	IL-6
1.07628	P	circulatory	parenteral	PS	80	2500000	2	male	IL-6
0.580362	P	circulatory	parenteral	PS-NH2	80	625000	2	male	IL-6
0.80651	P	circulatory	parenteral	PS-NH2	80	1250000	2	male	IL-6
0.902867	P	circulatory	parenteral	PS-NH2	80	2500000	2	male	IL-6
0.47017	P	circulatory	parenteral	PS-COOH	80	625000	2	male	IL-6
0.526688	P	circulatory	parenteral	PS-COOH	80	1250000	2	male	IL-6
0.812542	P	circulatory	parenteral	PS-COOH	80	2500000	2	male	IL-6
-0.0693432	L	immune	culture medium	PS	80	10	1	male	cell viability
-0.165223	L	immune	culture medium	PS	80	100	1	male	cell viability
-0.18821	L	immune	culture medium	PS	80	500	1	male	cell viability
-0.218833	L	immune	culture medium	PS	80	1000	1	male	cell viability
-0.305824	L	immune	culture medium	PS	80	5000	1	male	cell viability
-0.349422	L	immune	culture medium	PS	80	10000	1	male	cell viability
0.03192	L	immune	culture medium	PS	80	10	1	male	cell apoptosis
-0.147166	L	immune	culture medium	PS	80	100	1	male	cell apoptosis
0.0812204	L	immune	culture medium	PS	80	500	1	male	cell apoptosis
0.0898578	L	immune	culture medium	PS	80	1000	1	male	cell apoptosis
0.442917	L	immune	culture medium	PS	80	5000	1	male	cell apoptosis
0.683364	L	immune	culture medium	PS	80	10000	1	male	cell apoptosis
0.00984615	L	immune	culture medium	PS	80	10	1	male	TNF-α
0.13832	L	immune	culture medium	PS	80	100	1	male	TNF-α
0.490658	L	immune	culture medium	PS	80	1000	1	male	TNF-α
0.221068	L	immune	culture medium	PS	80	10000	1	male	TNF-α
0.334171	L	immune	culture medium	PS	80	10	1	male	IL-6
0.487684	L	immune	culture medium	PS	80	100	1	male	IL-6
0.247464	L	immune	culture medium	PS	80	1000	1	male	IL-6
0.218719	L	immune	culture medium	PS	80	10000	1	male	IL-6
0.130054	L	immune	culture medium	PS	80	10	1	male	IL-10
0.167592	L	immune	culture medium	PS	80	100	1	male	IL-10
-0.129465	L	immune	culture medium	PS	80	1000	1	male	IL-10
0.323683	L	immune	culture medium	PS	80	10000	1	male	IL-10
0.308189	L	immune	culture medium	PS	80	10	1	male	TNF-α
0.338474	L	immune	culture medium	PS	80	100	1	male	TNF-α
0.636005	L	immune	culture medium	PS	80	1000	1	male	TNF-α
0.477241	L	immune	culture medium	PS	80	10000	1	male	TNF-α
0.567137	L	immune	culture medium	PS	80	10	1	male	IL-6
0.692589	L	immune	culture medium	PS	80	100	1	male	IL-6
0.47478	L	immune	culture medium	PS	80	1000	1	male	IL-6
0.448124	L	immune	culture medium	PS	80	10000	1	male	IL-6
0.656789	L	immune	culture medium	PS	80	10	1	male	IL-10
0.662374	L	immune	culture medium	PS	80	100	1	male	IL-10
0.347932	L	immune	culture medium	PS	80	1000	1	male	IL-10
0.673367	L	immune	culture medium	PS	80	10000	1	male	IL-10
0.0307954	L	immune	culture medium	PS	80	10	1	male	ROS
0.0369663	L	immune	culture medium	PS	80	100	1	male	ROS
0.0607174	L	immune	culture medium	PS	80	1000	1	male	ROS
0.0953959	L	immune	culture medium	PS	80	10000	1	male	ROS
0.00221857	P	body	inhalant and nasal	PS	71	1000000	3	female	fetus weight
-0.0660148	P	body	inhalant and nasal	PS	71	5000000	3	female	fetus weight
-0.100816	P	body	inhalant and nasal	PS	71	25000000	3	female	fetus weight
-0.0109184	P	body	inhalant and nasal	PS	71	1000000	3	male	fetus weight
0.0221797	P	body	inhalant and nasal	PS	71	5000000	3	male	fetus weight
-0.0345171	P	body	inhalant and nasal	PS	71	25000000	3	male	fetus weight
-0.0378079	P	body	inhalant and nasal	PS	71	1000000	3	female	body weight
-0.0193635	P	body	inhalant and nasal	PS	71	5000000	3	female	body weight
-0.0607596	P	body	inhalant and nasal	PS	71	25000000	3	female	body weight
-0.102013	P	digestive	inhalant and nasal	PS	71	1000000	3	female	liver weight
-0.0454744	P	digestive	inhalant and nasal	PS	71	5000000	3	female	liver weight
-0.119922	P	digestive	inhalant and nasal	PS	71	25000000	3	female	liver weight
-0.0788035	P	digestive	inhalant and nasal	PS	71	1000000	3	female	liver coefficient
-0.0331267	P	digestive	inhalant and nasal	PS	71	5000000	3	female	liver coefficient
-0.0904978	P	digestive	inhalant and nasal	PS	71	25000000	3	female	liver coefficient
-0.0402027	P	digestive	inhalant and nasal	PS	71	1000000	3	female	TG
0.317338	P	digestive	inhalant and nasal	PS	71	5000000	3	female	TG
0.927697	P	digestive	inhalant and nasal	PS	71	25000000	3	female	TG
0.143287	P	digestive	inhalant and nasal	PS	71	1000000	3	female	AST
0.225551	P	digestive	inhalant and nasal	PS	71	5000000	3	female	AST
0.247089	P	digestive	inhalant and nasal	PS	71	25000000	3	female	AST
0.226692	P	digestive	inhalant and nasal	PS	71	1000000	3	female	ALT
0.266152	P	digestive	inhalant and nasal	PS	71	5000000	3	female	ALT
0.0214785	P	digestive	inhalant and nasal	PS	71	25000000	3	female	ALT
0.0641775	P	body	inhalant and nasal	PS	71	1000000	3	female	body weight
0.00366872	P	body	inhalant and nasal	PS	71	5000000	3	female	body weight
0.0432538	P	body	inhalant and nasal	PS	71	25000000	3	female	body weight
0.0742888	P	digestive	inhalant and nasal	PS	71	1000000	3	female	liver weight
0.0782933	P	digestive	inhalant and nasal	PS	71	5000000	3	female	liver weight
0.0228301	P	digestive	inhalant and nasal	PS	71	25000000	3	female	liver weight
0.014491	P	digestive	inhalant and nasal	PS	71	1000000	3	female	liver coefficient
0.0664777	P	digestive	inhalant and nasal	PS	71	5000000	3	female	liver coefficient
-0.0162972	P	digestive	inhalant and nasal	PS	71	25000000	3	female	liver coefficient
0.00489429	P	digestive	inhalant and nasal	PS	71	1000000	3	female	TG
0.231516	P	digestive	inhalant and nasal	PS	71	5000000	3	female	TG
0.655139	P	digestive	inhalant and nasal	PS	71	25000000	3	female	TG
-0.197417	P	digestive	inhalant and nasal	PS	71	1000000	3	female	AST
-0.0469032	P	digestive	inhalant and nasal	PS	71	5000000	3	female	AST
0.014326	P	digestive	inhalant and nasal	PS	71	25000000	3	female	AST
-0.103237	P	digestive	inhalant and nasal	PS	71	1000000	3	female	ALT
-0.0384355	P	digestive	inhalant and nasal	PS	71	5000000	3	female	ALT
0.386641	P	digestive	inhalant and nasal	PS	71	25000000	3	female	ALT
0.0840653	P	body	inhalant and nasal	PS	71	1000000	3	male	body weight
0.015596	P	body	inhalant and nasal	PS	71	5000000	3	male	body weight
-0.0103555	P	body	inhalant and nasal	PS	71	25000000	3	male	body weight
0.0483081	P	digestive	inhalant and nasal	PS	71	1000000	3	male	liver weight
0.00198029	P	digestive	inhalant and nasal	PS	71	5000000	3	male	liver weight
-0.00786841	P	digestive	inhalant and nasal	PS	71	25000000	3	male	liver weight
0.00384493	P	digestive	inhalant and nasal	PS	71	1000000	3	male	liver coefficient
0.00773185	P	digestive	inhalant and nasal	PS	71	5000000	3	male	liver coefficient
0.0184666	P	digestive	inhalant and nasal	PS	71	25000000	3	male	liver coefficient
0.0123965	P	digestive	inhalant and nasal	PS	71	1000000	3	male	TG
-0.387756	P	digestive	inhalant and nasal	PS	71	5000000	3	male	TG
-0.19581	P	digestive	inhalant and nasal	PS	71	25000000	3	male	TG
0.158949	P	digestive	inhalant and nasal	PS	71	1000000	3	male	AST
0.0757047	P	digestive	inhalant and nasal	PS	71	5000000	3	male	AST
0.0558268	P	digestive	inhalant and nasal	PS	71	25000000	3	male	AST
0.0703149	P	digestive	inhalant and nasal	PS	71	1000000	3	male	ALT
0.0399801	P	digestive	inhalant and nasal	PS	71	5000000	3	male	ALT
0.177522	P	digestive	inhalant and nasal	PS	71	25000000	3	male	ALT
-0.2377	P	digestive	inhalant and nasal	PS	71	1000000	3	female	genes expression (lipid metabolism)
0.257366	P	digestive	inhalant and nasal	PS	71	5000000	3	female	genes expression (lipid metabolism)
1.02308	P	digestive	inhalant and nasal	PS	71	25000000	3	female	genes expression (lipid metabolism)
0.344754	P	digestive	inhalant and nasal	PS	71	1000000	3	female	genes expression (lipid metabolism)
0.228155	P	digestive	inhalant and nasal	PS	71	5000000	3	female	genes expression (lipid metabolism)
0.882924	P	digestive	inhalant and nasal	PS	71	25000000	3	female	genes expression (lipid metabolism)
0.416233	P	digestive	inhalant and nasal	PS	71	1000000	3	female	genes expression (lipid metabolism)
0.923854	P	digestive	inhalant and nasal	PS	71	5000000	3	female	genes expression (lipid metabolism)
1.14358	P	digestive	inhalant and nasal	PS	71	25000000	3	female	genes expression (lipid metabolism)
0.245561	P	digestive	inhalant and nasal	PS	71	1000000	3	female	genes expression (lipid metabolism)
0.602123	P	digestive	inhalant and nasal	PS	71	5000000	3	female	genes expression (lipid metabolism)
0.787654	P	digestive	inhalant and nasal	PS	71	25000000	3	female	genes expression (lipid metabolism)
-0.103978	P	digestive	inhalant and nasal	PS	71	1000000	3	female	genes expression (lipid metabolism)
-0.188666	P	digestive	inhalant and nasal	PS	71	5000000	3	female	genes expression (lipid metabolism)
-0.486476	P	digestive	inhalant and nasal	PS	71	25000000	3	female	genes expression (lipid metabolism)
0.344063	P	digestive	inhalant and nasal	PS	71	1000000	3	female	genes expression (lipid metabolism)
0.653946	P	digestive	inhalant and nasal	PS	71	5000000	3	female	genes expression (lipid metabolism)
0.80989	P	digestive	inhalant and nasal	PS	71	25000000	3	female	genes expression (lipid metabolism)
0.32034	P	digestive	inhalant and nasal	PS	71	1000000	3	female	genes expression (lipid metabolism)
0.534616	P	digestive	inhalant and nasal	PS	71	5000000	3	female	genes expression (lipid metabolism)
0.418333	P	digestive	inhalant and nasal	PS	71	25000000	3	female	genes expression (lipid metabolism)
-0.08387	P	digestive	inhalant and nasal	PS	71	1000000	3	female	genes expression (lipid metabolism)
-0.295565	P	digestive	inhalant and nasal	PS	71	5000000	3	female	genes expression (lipid metabolism)
-0.249176	P	digestive	inhalant and nasal	PS	71	25000000	3	female	genes expression (lipid metabolism)
-0.0408587	P	digestive	inhalant and nasal	PS	71	1000000	3	female	genes expression (lipid metabolism)
0.0668482	P	digestive	inhalant and nasal	PS	71	5000000	3	female	genes expression (lipid metabolism)
-0.12682	P	digestive	inhalant and nasal	PS	71	25000000	3	female	genes expression (lipid metabolism)
-0.0407677	P	digestive	inhalant and nasal	PS	71	1000000	3	female	genes expression (lipid metabolism)
0.066755	P	digestive	inhalant and nasal	PS	71	5000000	3	female	genes expression (lipid metabolism)
-0.115953	P	digestive	inhalant and nasal	PS	71	25000000	3	female	genes expression (lipid metabolism)
-0.000846405	P	digestive	inhalant and nasal	PS	71	1000000	3	female	genes expression (lipid metabolism)
-0.210906	P	digestive	inhalant and nasal	PS	71	5000000	3	female	genes expression (lipid metabolism)
-0.145386	P	digestive	inhalant and nasal	PS	71	25000000	3	female	genes expression (lipid metabolism)
0.0652048	P	digestive	inhalant and nasal	PS	71	1000000	3	female	genes expression (lipid metabolism)
0.136221	P	digestive	inhalant and nasal	PS	71	5000000	3	female	genes expression (lipid metabolism)
0.404447	P	digestive	inhalant and nasal	PS	71	25000000	3	female	genes expression (lipid metabolism)
0.447428	P	digestive	inhalant and nasal	PS	71	1000000	3	female	genes expression (lipid metabolism)
0.465542	P	digestive	inhalant and nasal	PS	71	5000000	3	female	genes expression (lipid metabolism)
0.833315	P	digestive	inhalant and nasal	PS	71	25000000	3	female	genes expression (lipid metabolism)
0.10916	P	digestive	inhalant and nasal	PS	71	1000000	3	female	genes expression (lipid metabolism)
0.0640896	P	digestive	inhalant and nasal	PS	71	5000000	3	female	genes expression (lipid metabolism)
0.580142	P	digestive	inhalant and nasal	PS	71	25000000	3	female	genes expression (lipid metabolism)
0.277553	P	digestive	inhalant and nasal	PS	71	1000000	3	male	genes expression (lipid metabolism)
-0.236728	P	digestive	inhalant and nasal	PS	71	5000000	3	male	genes expression (lipid metabolism)
-0.555024	P	digestive	inhalant and nasal	PS	71	25000000	3	male	genes expression (lipid metabolism)
-0.128696	P	digestive	inhalant and nasal	PS	71	1000000	3	male	genes expression (lipid metabolism)
-0.284179	P	digestive	inhalant and nasal	PS	71	5000000	3	male	genes expression (lipid metabolism)
0.254734	P	digestive	inhalant and nasal	PS	71	25000000	3	male	genes expression (lipid metabolism)
-0.127719	P	digestive	inhalant and nasal	PS	71	1000000	3	male	genes expression (lipid metabolism)
-0.285053	P	digestive	inhalant and nasal	PS	71	5000000	3	male	genes expression (lipid metabolism)
0.253328	P	digestive	inhalant and nasal	PS	71	25000000	3	male	genes expression (lipid metabolism)
0.0472698	P	digestive	inhalant and nasal	PS	71	1000000	3	male	genes expression (lipid metabolism)
0.068806	P	digestive	inhalant and nasal	PS	71	5000000	3	male	genes expression (lipid metabolism)
0.0957105	P	digestive	inhalant and nasal	PS	71	25000000	3	male	genes expression (lipid metabolism)
-0.0368212	P	digestive	inhalant and nasal	PS	71	1000000	3	male	genes expression (lipid metabolism)
0.457533	P	digestive	inhalant and nasal	PS	71	5000000	3	male	genes expression (lipid metabolism)
0.590242	P	digestive	inhalant and nasal	PS	71	25000000	3	male	genes expression (lipid metabolism)
-0.220906	P	digestive	inhalant and nasal	PS	71	1000000	3	male	genes expression (lipid metabolism)
0.395418	P	digestive	inhalant and nasal	PS	71	5000000	3	male	genes expression (lipid metabolism)
0.638309	P	digestive	inhalant and nasal	PS	71	25000000	3	male	genes expression (lipid metabolism)
-0.110343	P	digestive	inhalant and nasal	PS	71	1000000	3	male	genes expression (lipid metabolism)
0.204319	P	digestive	inhalant and nasal	PS	71	5000000	3	male	genes expression (lipid metabolism)
0.436889	P	digestive	inhalant and nasal	PS	71	25000000	3	male	genes expression (lipid metabolism)
0.0324853	P	digestive	inhalant and nasal	PS	71	1000000	3	female	genes expression (lipid metabolism)
0.265557	P	digestive	inhalant and nasal	PS	71	5000000	3	female	genes expression (lipid metabolism)
0.3921	P	digestive	inhalant and nasal	PS	71	25000000	3	female	genes expression (lipid metabolism)
-0.021808	P	digestive	inhalant and nasal	PS	71	1000000	3	female	genes expression (lipid metabolism)
0.436485	P	digestive	inhalant and nasal	PS	71	5000000	3	female	genes expression (lipid metabolism)
0.358941	P	digestive	inhalant and nasal	PS	71	25000000	3	female	genes expression (lipid metabolism)
0.0678787	P	digestive	inhalant and nasal	PS	71	1000000	3	female	genes expression (lipid metabolism)
0.0816968	P	digestive	inhalant and nasal	PS	71	5000000	3	female	genes expression (lipid metabolism)
0.266686	P	digestive	inhalant and nasal	PS	71	25000000	3	female	genes expression (lipid metabolism)
0.402764	P	digestive	inhalant and nasal	PS	71	1000000	3	female	genes expression (lipid metabolism)
0.597998	P	digestive	inhalant and nasal	PS	71	5000000	3	female	genes expression (lipid metabolism)
0.699729	P	digestive	inhalant and nasal	PS	71	25000000	3	female	genes expression (lipid metabolism)
-0.0155523	P	digestive	inhalant and nasal	PS	71	1000000	3	female	genes expression (lipid metabolism)
0.114	P	digestive	inhalant and nasal	PS	71	5000000	3	female	genes expression (lipid metabolism)
0.146552	P	digestive	inhalant and nasal	PS	71	25000000	3	female	genes expression (lipid metabolism)
0.249742	P	digestive	inhalant and nasal	PS	71	1000000	3	female	genes expression (lipid metabolism)
0.593833	P	digestive	inhalant and nasal	PS	71	5000000	3	female	genes expression (lipid metabolism)
0.690906	P	digestive	inhalant and nasal	PS	71	25000000	3	female	genes expression (lipid metabolism)
-0.0757525	P	digestive	inhalant and nasal	PS	71	1000000	3	female	genes expression (lipid metabolism)
0.16743	P	digestive	inhalant and nasal	PS	71	5000000	3	female	genes expression (lipid metabolism)
-0.128508	P	digestive	inhalant and nasal	PS	71	25000000	3	female	genes expression (lipid metabolism)
-0.0305443	P	digestive	inhalant and nasal	PS	71	1000000	3	female	genes expression (lipid metabolism)
0.0227041	P	digestive	inhalant and nasal	PS	71	5000000	3	female	genes expression (lipid metabolism)
-0.0916367	P	digestive	inhalant and nasal	PS	71	25000000	3	female	genes expression (lipid metabolism)
0.441235	P	digestive	inhalant and nasal	PS	71	1000000	3	female	genes expression (lipid metabolism)
0.446754	P	digestive	inhalant and nasal	PS	71	5000000	3	female	genes expression (lipid metabolism)
0.579826	P	digestive	inhalant and nasal	PS	71	25000000	3	female	genes expression (lipid metabolism)
0.158552	P	digestive	inhalant and nasal	PS	71	1000000	3	female	genes expression (lipid metabolism)
0.265166	P	digestive	inhalant and nasal	PS	71	5000000	3	female	genes expression (lipid metabolism)
0.080192	P	digestive	inhalant and nasal	PS	71	25000000	3	female	genes expression (lipid metabolism)
0.226099	P	digestive	inhalant and nasal	PS	71	1000000	3	female	genes expression (lipid metabolism)
0.100617	P	digestive	inhalant and nasal	PS	71	5000000	3	female	genes expression (lipid metabolism)
0.437126	P	digestive	inhalant and nasal	PS	71	25000000	3	female	genes expression (lipid metabolism)
0.150336	P	digestive	inhalant and nasal	PS	71	1000000	3	female	genes expression (lipid metabolism)
0.0880649	P	digestive	inhalant and nasal	PS	71	5000000	3	female	genes expression (lipid metabolism)
0.47636	P	digestive	inhalant and nasal	PS	71	25000000	3	female	genes expression (lipid metabolism)
0.0261857	P	body	inhalant and nasal	PS	80	125000	5	male	body weight
0.0476016	P	body	inhalant and nasal	PS	80	1250000	5	male	body weight
0.0447923	P	body	inhalant and nasal	PS	80	3750000	5	male	body weight
-0.00116017	P	digestive	inhalant and nasal	PS	80	125000	5	male	liver coefficient
0.0472047	P	digestive	inhalant and nasal	PS	80	1250000	5	male	liver coefficient
0.0839699	P	digestive	inhalant and nasal	PS	80	3750000	5	male	liver coefficient
0.0361155	P	endocrine	inhalant and nasal	PS	80	125000	5	male	other organs' weights/coefficents
0.091513	P	endocrine	inhalant and nasal	PS	80	1250000	5	male	other organs' weights/coefficents
0.216444	P	endocrine	inhalant and nasal	PS	80	3750000	5	male	other organs' weights/coefficents
0.172498	P	circulatory	inhalant and nasal	PS	80	125000	5	male	TC
0.187344	P	circulatory	inhalant and nasal	PS	80	1250000	5	male	TC
0.270536	P	circulatory	inhalant and nasal	PS	80	3750000	5	male	TC
0.0572993	P	circulatory	inhalant and nasal	PS	80	125000	5	male	TG
0.196337	P	circulatory	inhalant and nasal	PS	80	1250000	5	male	TG
0.355535	P	circulatory	inhalant and nasal	PS	80	3750000	5	male	TG
0.42116	P	circulatory	inhalant and nasal	PS	80	125000	5	male	ALT
0.408413	P	circulatory	inhalant and nasal	PS	80	1250000	5	male	ALT
0.595786	P	circulatory	inhalant and nasal	PS	80	3750000	5	male	ALT
0.071604	P	circulatory	inhalant and nasal	PS	80	125000	5	male	AST
0.0844451	P	circulatory	inhalant and nasal	PS	80	1250000	5	male	AST
0.357305	P	circulatory	inhalant and nasal	PS	80	3750000	5	male	AST
-0.0114003	P	digestive	inhalant and nasal	PS	80	125000	5	male	ROS
0.0757119	P	digestive	inhalant and nasal	PS	80	1250000	5	male	ROS
0.229202	P	digestive	inhalant and nasal	PS	80	3750000	5	male	ROS
0.265331	P	digestive	inhalant and nasal	PS	80	125000	5	male	MDA
0.387574	P	digestive	inhalant and nasal	PS	80	1250000	5	male	MDA
0.504951	P	digestive	inhalant and nasal	PS	80	3750000	5	male	MDA
-0.0879549	P	digestive	inhalant and nasal	PS	80	125000	5	male	GSH
-0.0113839	P	digestive	inhalant and nasal	PS	80	1250000	5	male	GSH
-0.250241	P	digestive	inhalant and nasal	PS	80	3750000	5	male	GSH
0.408434	P	endocrine	inhalant and nasal	PS	80	125000	5	male	ROS
0.538648	P	endocrine	inhalant and nasal	PS	80	1250000	5	male	ROS
0.632494	P	endocrine	inhalant and nasal	PS	80	3750000	5	male	ROS
0.452964	P	endocrine	inhalant and nasal	PS	80	125000	5	male	MDA
0.703224	P	endocrine	inhalant and nasal	PS	80	1250000	5	male	MDA
1.29439	P	endocrine	inhalant and nasal	PS	80	3750000	5	male	MDA
-0.0343987	P	endocrine	inhalant and nasal	PS	80	125000	5	male	GSH
-0.193434	P	endocrine	inhalant and nasal	PS	80	1250000	5	male	GSH
-0.199914	P	endocrine	inhalant and nasal	PS	80	3750000	5	male	GSH
-0.0211102	P	circulatory	inhalant and nasal	PS	80	125000	5	male	TNF-α
-0.0164612	P	circulatory	inhalant and nasal	PS	80	1250000	5	male	TNF-α
-0.0585486	P	circulatory	inhalant and nasal	PS	80	3750000	5	male	TNF-α
-0.0305439	P	circulatory	inhalant and nasal	PS	80	125000	5	male	IL-6
0.0117349	P	circulatory	inhalant and nasal	PS	80	1250000	5	male	IL-6
-0.0094817	P	circulatory	inhalant and nasal	PS	80	3750000	5	male	IL-6
0.322909	P	respiratory	inhalant and nasal	amino-modified polystyrene (APS)	100	416666	2	male	other organs' weights/coefficents
-0.124642	P	body	inhalant and nasal	amino-modified polystyrene (APS)	100	375000	2	male	body weight
0.54845	P	respiratory	inhalant and nasal	amino-modified polystyrene (APS)	100	416666	2	male	GSH
0.506074	P	respiratory	inhalant and nasal	amino-modified polystyrene (APS)	100	416666	2	male	MDA
0.507861	P	respiratory	inhalant and nasal	amino-modified polystyrene (APS)	100	416666	2	male	TNF-α
0.564933	P	respiratory	inhalant and nasal	amino-modified polystyrene (APS)	100	416666	2	male	IL-6
0.460009	P	respiratory	inhalant and nasal	amino-modified polystyrene (APS)	100	416666	2	male	IL-1β
1.99458	P	respiratory	inhalant and nasal	amino-modified polystyrene (APS)	100	416666	2	male	TNF-α
1.19778	P	respiratory	inhalant and nasal	amino-modified polystyrene (APS)	100	416666	2	male	IL-6
1.75334	P	respiratory	inhalant and nasal	amino-modified polystyrene (APS)	100	416666	2	male	IL-1β
0.683316	L	respiratory	culture medium	amino-modified polystyrene (APS)	100	416666	2	male	IL-1β
0.632688	L	respiratory	culture medium	amino-modified polystyrene (APS)	100	416666	2	male	IL-6
0.874119	L	respiratory	culture medium	amino-modified polystyrene (APS)	100	416666	2	male	IL-1β
-0.0424358	P	body	oral	PS	50	0.1	3	unknown	fetus weight
-0.0979274	P	body	oral	PS	50	10	3	unknown	fetus weight
-0.125978	P	body	oral	PS	50	1000	3	unknown	fetus weight
-0.0471912	P	body	oral	PS	50	0.1	3	unknown	placenta weight
-0.0250595	P	body	oral	PS	50	10	3	unknown	placenta weight
-0.027679	P	body	oral	PS	50	1000	3	unknown	placenta weight
0.221143	P	digestive	parenteral	PS	100	62500	2	male	TNF-α
0.141756	P	digestive	parenteral	PS	100	62500	2	male	IL-6
0.139876	P	digestive	parenteral	PS	100	62500	2	male	MDA
-0.150646	P	digestive	parenteral	PS	100	62500	2	male	CAT
-0.162951	P	digestive	parenteral	PS	100	62500	2	male	GSH
-0.311617	P	digestive	parenteral	PS	100	62500	2	male	SOD
0.000287087	P	reproductive	parenteral	PS	20	12500	1	male	cell viability
-0.0440222	P	reproductive	parenteral	PS	20	25000	1	male	cell viability
-0.0399341	P	reproductive	parenteral	PS	20	50000	1	male	cell viability
-0.365027	P	reproductive	parenteral	PS	20	100000	1	male	cell viability
-0.591811	P	reproductive	parenteral	PS	20	200000	1	male	cell viability
-0.154686	P	body	oral	PS	100	100	3	unknown	body weight
-0.369495	P	body	oral	PS	100	1000	3	unknown	body weight
-0.454588	P	body	oral	PS	100	10000	3	unknown	body weight
-0.0440491	P	body	oral	PS	100	100	5	unknown	body weight
-0.0761938	P	body	oral	PS	100	1000	5	unknown	body weight
-0.130347	P	body	oral	PS	100	10000	5	unknown	body weight
-0.0885215	P	digestive	oral	PS	100	100	3	unknown	liver weight
-0.380461	P	digestive	oral	PS	100	1000	3	unknown	liver weight
-0.513119	P	digestive	oral	PS	100	10000	3	unknown	liver weight
0.0688455	P	digestive	oral	PS	100	100	3	unknown	liver coefficient
-0.0026313	P	digestive	oral	PS	100	1000	3	unknown	liver coefficient
-0.0414444	P	digestive	oral	PS	100	10000	3	unknown	liver coefficient
-0.0652664	P	digestive	oral	PS	100	100	5	unknown	liver coefficient
0.00467936	P	digestive	oral	PS	100	1000	5	unknown	liver coefficient
0.103548	P	digestive	oral	PS	100	10000	5	unknown	liver coefficient
0.0332692	P	digestive	oral	PS	100	100	3	male	MDA
0.158815	P	digestive	oral	PS	100	1000	3	male	MDA
0.424332	P	digestive	oral	PS	100	10000	3	male	MDA
0.236391	P	digestive	oral	PS	100	100	5	male	MDA
0.450116	P	digestive	oral	PS	100	1000	5	male	MDA
0.651535	P	digestive	oral	PS	100	10000	5	male	MDA
-0.0336439	P	digestive	oral	PS	100	100	3	male	SOD
-0.094752	P	digestive	oral	PS	100	1000	3	male	SOD
-0.239897	P	digestive	oral	PS	100	10000	3	male	SOD
0.0073034	P	digestive	oral	PS	100	100	5	male	SOD
0.109675	P	digestive	oral	PS	100	1000	5	male	SOD
0.192639	P	digestive	oral	PS	100	10000	5	male	SOD
-0.11159	P	digestive	oral	PS	100	100	3	male	CAT
-0.0319442	P	digestive	oral	PS	100	1000	3	male	CAT
-0.263571	P	digestive	oral	PS	100	10000	3	male	CAT
0.0455554	P	digestive	oral	PS	100	100	5	male	CAT
0.0761821	P	digestive	oral	PS	100	1000	5	male	CAT
0.295962	P	digestive	oral	PS	100	10000	5	male	CAT
0.882517	P	digestive	oral	PS	100	100	3	male	IL-6
1.32113	P	digestive	oral	PS	100	1000	3	male	IL-6
1.57129	P	digestive	oral	PS	100	10000	3	male	IL-6
0.373888	P	digestive	oral	PS	100	100	5	male	IL-6
0.321093	P	digestive	oral	PS	100	1000	5	male	IL-6
0.354311	P	digestive	oral	PS	100	10000	5	male	IL-6
0.593703	P	digestive	oral	PS	100	100	3	male	TNF-α
1.44787	P	digestive	oral	PS	100	1000	3	male	TNF-α
1.82429	P	digestive	oral	PS	100	10000	3	male	TNF-α
0.242374	P	digestive	oral	PS	100	100	5	male	TNF-α
0.244115	P	digestive	oral	PS	100	1000	5	male	TNF-α
0.582245	P	digestive	oral	PS	100	10000	5	male	TNF-α
1.00501	P	digestive	oral	PS	100	100	3	male	IL-1β
1.14699	P	digestive	oral	PS	100	1000	3	male	IL-1β
1.35027	P	digestive	oral	PS	100	10000	3	male	IL-1β
0.152504	P	digestive	oral	PS	100	100	5	male	IL-1β
0.336161	P	digestive	oral	PS	100	1000	5	male	IL-1β
0.322325	P	digestive	oral	PS	100	10000	5	male	IL-1β
-0.0353388	P	reproductive	oral	PS	100	100	5	male	sperm number
-0.316335	P	reproductive	oral	PS	100	1000	5	male	sperm number
-0.469401	P	reproductive	oral	PS	100	10000	5	male	sperm number
-0.0740525	P	reproductive	oral	PS	100	100	3	male	MDA
0.217609	P	reproductive	oral	PS	100	1000	3	male	MDA
0.481524	P	reproductive	oral	PS	100	10000	3	male	MDA
0.0175787	P	reproductive	oral	PS	100	100	5	male	MDA
0.0849057	P	reproductive	oral	PS	100	1000	5	male	MDA
0.24105	P	reproductive	oral	PS	100	10000	5	male	MDA
-0.0694051	P	reproductive	oral	PS	100	100	3	male	SOD
-0.0897166	P	reproductive	oral	PS	100	1000	3	male	SOD
-0.28322	P	reproductive	oral	PS	100	10000	3	male	SOD
0.049958	P	reproductive	oral	PS	100	100	5	male	SOD
0.176604	P	reproductive	oral	PS	100	1000	5	male	SOD
0.206439	P	reproductive	oral	PS	100	10000	5	male	SOD
-0.305502	P	reproductive	oral	PS	100	100	3	male	CAT
-0.484768	P	reproductive	oral	PS	100	1000	3	male	CAT
-0.36387	P	reproductive	oral	PS	100	10000	3	male	CAT
0.35584	P	reproductive	oral	PS	100	100	5	male	CAT
0.560931	P	reproductive	oral	PS	100	1000	5	male	CAT
0.574022	P	reproductive	oral	PS	100	10000	5	male	CAT
-0.0389626	P	body	oral	PS	50	500	2	unknown	body weight
0.064763	P	body	oral	PS	50	10000	2	unknown	body weight
0.0970477	P	body	oral	PS	50	100000	2	unknown	body weight
0.133924	P	body	oral	PS	50	500000	2	unknown	body weight
-0.0829622	P	body	oral	PS	50	1000000	2	unknown	body weight
-0.251648	P	nervous	oral	PS	50	25000	2	unknown	TNF-α
-0.126287	P	nervous	oral	PS	50	25000	2	unknown	IL-1β
0.0291112	P	nervous	oral	PS	50	50000	3	male	GABA
0.177269	P	nervous	oral	PS	50	50000	3	female	GABA
0.14513	P	nervous	oral	PS	50	50000	3	male	GABA
-0.0133311	P	nervous	oral	PS	50	50000	3	female	GABA
-0.119355	P	nervous	oral	PS	50	50000	3	male	the total distance moved (OFT)
0.0637571	P	nervous	oral	PS	50	50000	3	female	the total distance moved (OFT)
-0.217542	P	nervous	oral	PS	50	50000	3	male	the distance in center areas (OFT)
0.133282	P	nervous	oral	PS	50	50000	3	female	the distance in center areas (OFT)
0.133539	P	nervous	oral	PS	50	50000	3	unknown	GABA
0.0600704	P	nervous	oral	PS	50	50000	3	unknown	GABA
-0.0889023	P	body	oral	PS	80	240000	4	unknown	body weight
-0.456352	P	excretory	parenteral	PS	96.1	62500	2	male	GSH
-0.315343	P	excretory	parenteral	PS	96.1	62500	2	male	GSH
-0.387813	P	excretory	parenteral	PS	96.1	62500	2	male	CAT
0.682681	P	excretory	parenteral	PS	96.1	62500	2	male	MDA
-0.440868	P	excretory	parenteral	PS	96.1	62500	2	male	genes expression (inhibiting apoptosis and necrocytosis)
0.536587	P	excretory	parenteral	PS	96.1	62500	2	male	genes expression (promoting apoptosis and necrocytosis)
0.536974	P	excretory	parenteral	PS	96.1	62500	2	male	genes expression (promoting apoptosis and necrocytosis)
0.377945	P	excretory	parenteral	PS	96.1	62500	2	male	genes expression (promoting apoptosis and necrocytosis)
1.56896	P	excretory	parenteral	PS	96.1	62500	2	male	cell apoptosis
-0.217039	P	excretory	parenteral	PS	96.1	62500	2	male	genes expression (inhibiting apoptosis and necrocytosis)
0.516686	P	excretory	parenteral	PS	96.1	62500	2	male	genes expression (promoting apoptosis and necrocytosis)
0.426105	P	excretory	parenteral	PS	96.1	62500	2	male	genes expression (promoting apoptosis and necrocytosis)
0.480624	P	excretory	parenteral	PS	96.1	62500	2	male	genes expression (promoting apoptosis and necrocytosis)
0.122271	P	nervous	oral	PS	50	31250	5	male	the distance in center areas (OFT)
-0.226738	P	nervous	oral	PS	50	312500	5	male	the distance in center areas (OFT)
-0.291406	P	nervous	oral	PS	50	3125000	5	male	the distance in center areas (OFT)
-0.180139	P	nervous	oral	PS	50	31250000	5	male	the distance in center areas (OFT)
-0.273515	P	nervous	oral	PS	50	31250	5	male	the total distance moved (OFT)
-0.182243	P	nervous	oral	PS	50	312500	5	male	the total distance moved (OFT)
-0.564081	P	nervous	oral	PS	50	3125000	5	male	the total distance moved (OFT)
-0.400083	P	nervous	oral	PS	50	31250000	5	male	the total distance moved (OFT)
0.34624	P	nervous	oral	PS	50	31250	5	male	IL-6
0.181978	P	nervous	oral	PS	50	312500	5	male	IL-6
-0.161586	P	nervous	oral	PS	50	3125000	5	male	IL-6
-0.667966	P	nervous	oral	PS	50	31250000	5	male	IL-6
-0.650779	P	nervous	oral	PS	50	31250	5	male	IL-10
-0.911773	P	nervous	oral	PS	50	312500	5	male	IL-10
-0.961076	P	nervous	oral	PS	50	3125000	5	male	IL-10
-1.56761	P	nervous	oral	PS	50	31250000	5	male	IL-10
0.290838	P	nervous	oral	PS	50	31250	5	male	IL-1β
0.0918465	P	nervous	oral	PS	50	312500	5	male	IL-1β
0.0507133	P	nervous	oral	PS	50	3125000	5	male	IL-1β
-0.319419	P	nervous	oral	PS	50	31250000	5	male	IL-1β
-0.350631	P	nervous	oral	PS	50	31250	5	male	TNF-α
-0.40833	P	nervous	oral	PS	50	312500	5	male	TNF-α
-0.604541	P	nervous	oral	PS	50	3125000	5	male	TNF-α
-0.926009	P	nervous	oral	PS	50	31250000	5	male	TNF-α
-0.0355388	P	nervous	oral	PS	50	31250	5	male	IL-6
-0.000730538	P	nervous	oral	PS	50	312500	5	male	IL-6
-0.412729	P	nervous	oral	PS	50	3125000	5	male	IL-6
0.0428705	P	nervous	oral	PS	50	31250000	5	male	IL-6
-0.0557428	P	nervous	oral	PS	50	31250	5	male	IL-10
-0.505879	P	nervous	oral	PS	50	312500	5	male	IL-10
-0.843278	P	nervous	oral	PS	50	3125000	5	male	IL-10
-0.508229	P	nervous	oral	PS	50	31250000	5	male	IL-10
0.24535	P	nervous	oral	PS	50	31250	5	male	IL-1β
-0.0264402	P	nervous	oral	PS	50	312500	5	male	IL-1β
-0.0766676	P	nervous	oral	PS	50	3125000	5	male	IL-1β
0.0062414	P	nervous	oral	PS	50	31250000	5	male	IL-1β
0.185505	P	nervous	oral	PS	50	31250	5	male	TNF-α
0.0200912	P	nervous	oral	PS	50	312500	5	male	TNF-α
0.0486455	P	nervous	oral	PS	50	3125000	5	male	TNF-α
-0.0604577	P	nervous	oral	PS	50	31250000	5	male	TNF-α
0.744502	P	nervous	oral	PS	50	31250	5	male	IL-6
0.581555	P	nervous	oral	PS	50	312500	5	male	IL-6
0.593163	P	nervous	oral	PS	50	3125000	5	male	IL-6
-0.177586	P	nervous	oral	PS	50	31250000	5	male	IL-6
0.211396	P	nervous	oral	PS	50	31250	5	male	IL-10
-0.225765	P	nervous	oral	PS	50	312500	5	male	IL-10
-0.306223	P	nervous	oral	PS	50	3125000	5	male	IL-10
-1.05794	P	nervous	oral	PS	50	31250000	5	male	IL-10
-0.292087	P	nervous	oral	PS	50	31250	5	male	IL-1β
-0.364237	P	nervous	oral	PS	50	312500	5	male	IL-1β
-0.369715	P	nervous	oral	PS	50	3125000	5	male	IL-1β
-0.319068	P	nervous	oral	PS	50	31250000	5	male	IL-1β
0.381452	P	nervous	oral	PS	50	31250	5	male	TNF-α
-0.192187	P	nervous	oral	PS	50	312500	5	male	TNF-α
-0.1371	P	nervous	oral	PS	50	3125000	5	male	TNF-α
-0.35435	P	nervous	oral	PS	50	31250000	5	male	TNF-α
0.339973	P	nervous	oral	PS	50	31250	5	male	IL-6
0.354046	P	nervous	oral	PS	50	312500	5	male	IL-6
0.588159	P	nervous	oral	PS	50	3125000	5	male	IL-6
0.596946	P	nervous	oral	PS	50	31250000	5	male	IL-6
-0.153827	P	nervous	oral	PS	50	31250	5	male	IL-10
0.344113	P	nervous	oral	PS	50	312500	5	male	IL-10
0.377056	P	nervous	oral	PS	50	3125000	5	male	IL-10
0.128771	P	nervous	oral	PS	50	31250000	5	male	IL-10
-0.0389819	P	nervous	oral	PS	50	31250	5	male	IL-1β
-0.399433	P	nervous	oral	PS	50	312500	5	male	IL-1β
0.309891	P	nervous	oral	PS	50	3125000	5	male	IL-1β
0.369027	P	nervous	oral	PS	50	31250000	5	male	IL-1β
0.0284042	P	nervous	oral	PS	50	31250	5	male	TNF-α
0.328577	P	nervous	oral	PS	50	312500	5	male	TNF-α
0.653477	P	nervous	oral	PS	50	3125000	5	male	TNF-α
0.739687	P	nervous	oral	PS	50	31250000	5	male	TNF-α
-0.0837774	P	circulatory	parenteral	PS	100	62500	2	male	SOD
-0.428768	P	circulatory	parenteral	PS	100	62500	2	male	GSH
-0.427572	P	circulatory	parenteral	PS	100	62500	2	male	CAT
0.557681	P	circulatory	parenteral	PS	100	62500	2	male	MDA
0.245838	P	circulatory	parenteral	PS	100	62500	2	male	ROS
0.0992705	P	nervous	inhalant and nasal	PS-COOH	80	83333	1	male	the total distance moved (OFT)
0.0853937	P	nervous	inhalant and nasal	PS-NH2	80	83333	1	male	the total distance moved (OFT)
-0.28463	P	nervous	inhalant and nasal	PS-COOH	80	83333	2	male	the total distance moved (OFT)
-0.74236	P	nervous	inhalant and nasal	PS-NH2	80	83333	2	male	the total distance moved (OFT)
0.352434	P	nervous	inhalant and nasal	PS-COOH	80	83333	1	male	the distance in center areas (OFT)
0.402546	P	nervous	inhalant and nasal	PS-NH2	80	83333	1	male	the distance in center areas (OFT)
-0.523158	P	nervous	inhalant and nasal	PS-COOH	80	83333	2	male	the distance in center areas (OFT)
-0.524564	P	nervous	inhalant and nasal	PS-NH2	80	83333	2	male	the distance in center areas (OFT)
-0.400985	P	nervous	inhalant and nasal	PS-COOH	80	83333	2	male	AChE activity
-0.362184	P	nervous	inhalant and nasal	PS-NH2	80	83333	2	male	AChE activity
0.169809	P	nervous	inhalant and nasal	PS-COOH	80	83333	2	male	TNF-α
0.187253	P	nervous	inhalant and nasal	PS-NH2	80	83333	2	male	TNF-α
0.0332959	P	nervous	inhalant and nasal	PS-COOH	80	83333	2	male	IL-6
0.214559	P	nervous	inhalant and nasal	PS-NH2	80	83333	2	male	IL-6
-0.476898	P	reproductive	oral	PS	40	500000	4	male	testosterone
-0.0122485	P	circulatory	culture medium	PS	40	50000	1	unknown	cell viability
-0.43597	P	circulatory	culture medium	PS	40	500000	1	unknown	cell viability
-0.188638	P	circulatory	culture medium	PS	40	50000	2	unknown	cell viability
-0.84963	P	circulatory	culture medium	PS	40	500000	2	unknown	cell viability
0.896311	P	nervous	oral	PS	50	625000	2	male	fluorescent intensity
0.906511	L	nervous	culture medium	PS	50	25000	1	unknown	TNF-α
1.51248	L	nervous	culture medium	PS	50	50000	1	unknown	TNF-α
1.74637	L	nervous	culture medium	PS	50	100000	1	unknown	TNF-α
0.233007	L	nervous	culture medium	PS	50	25000	1	unknown	IL-1β
0.345583	L	nervous	culture medium	PS	50	50000	1	unknown	IL-1β
0.449805	L	nervous	culture medium	PS	50	100000	1	unknown	IL-1β
-0.118292	L	nervous	culture medium	PS	50	100000	1	unknown	cell viability
-0.182603	L	digestive	culture medium	PS	60	1600	2	unknown	genes expression (lipid metabolism)
-0.202911	L	digestive	culture medium	PS	60	1600	2	unknown	genes expression (lipid metabolism)
-0.0796974	L	digestive	culture medium	PS	60	1600	2	unknown	genes expression (lipid metabolism)
0	P	circulatory	oral	PS	60	15	5	male	other organs' weights/coefficents
0	P	circulatory	oral	PS	60	1115	5	male	other organs' weights/coefficents
-0.0951366	P	endocrine	oral	PS	60	15	5	male	other organs' weights/coefficents
-0.0951366	P	endocrine	oral	PS	60	1115	5	male	other organs' weights/coefficents
-0.0108204	P	digestive	oral	PS	60	15	5	male	liver weight
0.0105586	P	digestive	oral	PS	60	1115	5	male	liver weight
-0.0330949	P	excretory	oral	PS	60	15	5	male	other organs' weights/coefficents
-0.0666318	P	excretory	oral	PS	60	1115	5	male	other organs' weights/coefficents
-0.0652899	P	reproductive	oral	PS	60	15	5	male	genes expression (lipid metabolism)
-0.0818226	P	reproductive	oral	PS	60	1115	5	male	genes expression (lipid metabolism)
-0.397526	P	reproductive	oral	PS	60	15	5	male	genes expression (lipid metabolism)
-0.496254	P	reproductive	oral	PS	60	1115	5	male	genes expression (lipid metabolism)
-0.287475	P	reproductive	oral	PS	60	15	5	male	genes expression (lipid metabolism)
-0.246298	P	reproductive	oral	PS	60	1115	5	male	genes expression (lipid metabolism)
0.0181078	P	reproductive	oral	PS	60	15	5	male	genes expression (lipid metabolism)
0.0956087	P	reproductive	oral	PS	60	1115	5	male	genes expression (lipid metabolism)
0.165541	P	digestive	oral	PS	60	15	5	male	TG
0.0862247	P	digestive	oral	PS	60	1115	5	male	TG
0.36012	P	digestive	oral	PS	60	15	5	male	genes expression (lipid metabolism)
0.23909	P	digestive	oral	PS	60	1115	5	male	genes expression (lipid metabolism)
0.239182	P	digestive	oral	PS	60	15	5	male	genes expression (lipid metabolism)
-0.0561128	P	digestive	oral	PS	60	1115	5	male	genes expression (lipid metabolism)
0.135438	P	digestive	oral	PS	60	15	5	male	genes expression (lipid metabolism)
0.227386	P	digestive	oral	PS	60	1115	5	male	genes expression (lipid metabolism)
0.146832	P	digestive	oral	PS	60	15	5	male	genes expression (lipid metabolism)
0.0746704	P	digestive	oral	PS	60	1115	5	male	genes expression (lipid metabolism)
0.768809	P	circulatory	parenteral	PS	100	62500	2	male	genes expression (promoting apoptosis and necrocytosis)
0.387519	P	circulatory	parenteral	PS	100	62500	2	male	genes expression (promoting apoptosis and necrocytosis)
0.693145	P	circulatory	parenteral	PS	100	62500	2	male	genes expression (promoting apoptosis and necrocytosis)
-0.354307	P	circulatory	parenteral	PS	100	62500	2	male	genes expression (inhibiting apoptosis and necrocytosis)
0.390869	P	circulatory	parenteral	PS	100	62500	2	male	genes expression (promoting apoptosis and necrocytosis)
1.03952	P	circulatory	parenteral	PS	100	62500	2	male	genes expression (promoting apoptosis and necrocytosis)
0.461348	P	circulatory	parenteral	PS	100	62500	2	male	genes expression (promoting apoptosis and necrocytosis)
-0.392315	P	circulatory	parenteral	PS	100	62500	2	male	genes expression (inhibiting apoptosis and necrocytosis)
0.97064	P	circulatory	parenteral	PS	100	62500	2	male	IL-6
0.268842	P	circulatory	parenteral	PS	100	62500	2	male	IL-1β
0.270572	P	circulatory	parenteral	PS	100	62500	2	male	TNF-α
0.81106	P	circulatory	parenteral	PS	100	62500	2	male	IL-6
0.426155	P	circulatory	parenteral	PS	100	62500	2	male	IL-1β
0.869036	P	circulatory	parenteral	PS	100	62500	2	male	TNF-α
-0.187637	P	circulatory	parenteral	PS	100	62500	2	male	GSH
-0.0662412	P	circulatory	parenteral	PS	100	62500	2	male	CAT
-0.318989	P	circulatory	parenteral	PS	100	62500	2	male	SOD
0.529982	P	circulatory	parenteral	PS	100	62500	2	male	MDA
0.693996	P	circulatory	parenteral	PS	100	62500	2	male	ROS
0.380552	L	immune	culture medium	PS	100	100000	1	male	genes expression (promoting apoptosis and necrocytosis)
0.527473	L	immune	culture medium	PS	100	100000	1	male	genes expression (promoting apoptosis and necrocytosis)
0.405467	L	immune	culture medium	PS	100	100000	1	male	genes expression (promoting apoptosis and necrocytosis)
-0.209304	L	immune	culture medium	PS	100	100000	1	male	genes expression (inhibiting apoptosis and necrocytosis)
0.674456	L	immune	culture medium	PS	100	100000	1	male	genes expression (promoting apoptosis and necrocytosis)
0.646627	L	immune	culture medium	PS	100	100000	1	male	genes expression (promoting apoptosis and necrocytosis)
0.367727	L	immune	culture medium	PS	100	100000	1	male	genes expression (promoting apoptosis and necrocytosis)
-0.0458932	L	immune	culture medium	PS	100	100000	1	male	genes expression (inhibiting apoptosis and necrocytosis)
0.497104	L	immune	culture medium	PS	100	100000	1	male	IL-6
0.547583	L	immune	culture medium	PS	100	100000	1	male	IL-1β
0.234766	L	immune	culture medium	PS	100	100000	1	male	TNF-α
0.414434	L	immune	culture medium	PS	100	100000	1	male	IL-6
0.223145	L	immune	culture medium	PS	100	100000	1	male	IL-1β
1.31219	L	immune	culture medium	PS	100	100000	1	male	TNF-α
0.795386	P	reproductive	oral	PS	100	5000000	3	female	fluorescent intensity
1.07919	P	reproductive	oral	PS-COOH	100	5000000	3	female	fluorescent intensity
0.56424	P	body	oral	PS	100	5000000	3	unknown	fluorescent intensity
0.616102	P	body	oral	PS-COOH	100	5000000	3	unknown	fluorescent intensity
1.36793	P	reproductive	oral	PS	100	5000000	3	female	fluorescent intensity
1.54165	P	reproductive	oral	PS-COOH	100	5000000	3	female	fluorescent intensity
0	P	reproductive	oral	PS	100	5000000	3	female	fluorescent intensity
-0.117202	P	reproductive	oral	PS-COOH	100	5000000	3	female	fluorescent intensity
0.381488	P	nervous	oral	PS	100	5000000	3	unknown	fluorescent intensity
0.458041	P	nervous	oral	PS-COOH	100	5000000	3	unknown	fluorescent intensity
-0.360923	P	nervous	oral	PS	100	5000000	3	unknown	GABA
-0.393571	P	nervous	oral	PS-COOH	100	5000000	3	unknown	GABA
-0.303991	P	nervous	oral	PS	100	5000000	3	unknown	GABA
-0.367671	P	nervous	oral	PS-COOH	100	5000000	3	unknown	GABA
2.08133	P	nervous	oral	PS	100	5000000	3	unknown	cell apoptosis
2.28017	P	nervous	oral	PS-COOH	100	5000000	3	unknown	cell apoptosis
-0.0452289	L	nervous	culture medium	PS	100	60000	1	unknown	cell viability
-0.0759031	L	nervous	culture medium	PS	100	120000	1	unknown	cell viability
0.0145891	L	nervous	culture medium	PS	100	240000	1	unknown	cell viability
-0.108718	L	nervous	culture medium	PS	100	480000	1	unknown	cell viability
-0.0422321	L	nervous	culture medium	PS-COOH	100	60000	1	unknown	cell viability
0.0135672	L	nervous	culture medium	PS-COOH	100	120000	1	unknown	cell viability
-0.0288877	L	nervous	culture medium	PS-COOH	100	240000	1	unknown	cell viability
-0.133796	L	nervous	culture medium	PS-COOH	100	480000	1	unknown	cell viability
-0.0978247	L	nervous	culture medium	PS	100	60000	2	unknown	cell viability
-0.158416	L	nervous	culture medium	PS	100	120000	2	unknown	cell viability
-0.347212	L	nervous	culture medium	PS	100	240000	2	unknown	cell viability
-0.510299	L	nervous	culture medium	PS	100	480000	2	unknown	cell viability
-0.145646	L	nervous	culture medium	PS-COOH	100	60000	2	unknown	cell viability
-0.283492	L	nervous	culture medium	PS-COOH	100	120000	2	unknown	cell viability
-0.680798	L	nervous	culture medium	PS-COOH	100	240000	2	unknown	cell viability
-0.755532	L	nervous	culture medium	PS-COOH	100	480000	2	unknown	cell viability
0.267325	L	nervous	culture medium	PS	100	60000	2	unknown	ROS
0.308411	L	nervous	culture medium	PS	100	240000	2	unknown	ROS
0.707553	L	nervous	culture medium	PS-COOH	100	60000	2	unknown	ROS
0.721129	L	nervous	culture medium	PS-COOH	100	240000	2	unknown	ROS
0.538992	L	nervous	culture medium	PS	100	60000	2	unknown	cell apoptosis
0.666744	L	nervous	culture medium	PS	100	240000	2	unknown	cell apoptosis
0.832044	L	nervous	culture medium	PS-COOH	100	60000	2	unknown	cell apoptosis
1.17526	L	nervous	culture medium	PS-COOH	100	240000	2	unknown	cell apoptosis
0.813213	L	nervous	culture medium	PS	100	60000	2	unknown	genes expression (promoting apoptosis and necrocytosis)
0.971496	L	nervous	culture medium	PS	100	240000	2	unknown	genes expression (promoting apoptosis and necrocytosis)
1.10764	L	nervous	culture medium	PS-COOH	100	60000	2	unknown	genes expression (promoting apoptosis and necrocytosis)
1.18824	L	nervous	culture medium	PS-COOH	100	240000	2	unknown	genes expression (promoting apoptosis and necrocytosis)
-0.169706	L	nervous	culture medium	PS	100	60000	2	unknown	genes expression (inhibiting apoptosis and necrocytosis)
-0.43211	L	nervous	culture medium	PS	100	240000	2	unknown	genes expression (inhibiting apoptosis and necrocytosis)
-0.674436	L	nervous	culture medium	PS-COOH	100	60000	2	unknown	genes expression (inhibiting apoptosis and necrocytosis)
-0.906761	L	nervous	culture medium	PS-COOH	100	240000	2	unknown	genes expression (inhibiting apoptosis and necrocytosis)
0.533913	P	reproductive	oral	PS	100	5000000	3	female	genes expression (promoting apoptosis and necrocytosis)
0.614764	P	reproductive	oral	PS-COOH	100	5000000	3	female	genes expression (promoting apoptosis and necrocytosis)
2.22452	P	reproductive	oral	PS	100	5000000	3	female	cell apoptosis
2.29325	P	reproductive	oral	PS-COOH	100	5000000	3	female	cell apoptosis
0.00940778	L	reproductive	culture medium	PS	100	60000	1	female	cell viability
-0.0405327	L	reproductive	culture medium	PS	100	120000	1	female	cell viability
-0.0418623	L	reproductive	culture medium	PS	100	240000	1	female	cell viability
0.0113328	L	reproductive	culture medium	PS	100	480000	1	female	cell viability
-0.0265036	L	reproductive	culture medium	PS-COOH	100	60000	1	female	cell viability
0.0253359	L	reproductive	culture medium	PS-COOH	100	120000	1	female	cell viability
-0.00914065	L	reproductive	culture medium	PS-COOH	100	240000	1	female	cell viability
-0.0245217	L	reproductive	culture medium	PS-COOH	100	480000	1	female	cell viability
-0.106554	L	reproductive	culture medium	PS	100	60000	2	female	cell viability
-0.236199	L	reproductive	culture medium	PS	100	120000	2	female	cell viability
-0.409718	L	reproductive	culture medium	PS	100	240000	2	female	cell viability
-0.57362	L	reproductive	culture medium	PS	100	480000	2	female	cell viability
-0.130647	L	reproductive	culture medium	PS-COOH	100	60000	2	female	cell viability
-0.150743	L	reproductive	culture medium	PS-COOH	100	120000	2	female	cell viability
-0.339248	L	reproductive	culture medium	PS-COOH	100	240000	2	female	cell viability
-0.5119	L	reproductive	culture medium	PS-COOH	100	480000	2	female	cell viability
0.364552	L	reproductive	culture medium	PS	100	60000	2	female	ROS
0.417303	L	reproductive	culture medium	PS-COOH	100	60000	2	female	ROS
0.478961	L	reproductive	culture medium	PS	100	60000	2	female	cell apoptosis
0.705327	L	reproductive	culture medium	PS-COOH	100	60000	2	female	cell apoptosis
0.0784232	L	reproductive	culture medium	PS	100	60000	2	female	genes expression (promoting apoptosis and necrocytosis)
0.670167	L	reproductive	culture medium	PS-COOH	100	60000	2	female	genes expression (promoting apoptosis and necrocytosis)
-0.307625	L	reproductive	culture medium	PS	100	60000	2	female	genes expression (inhibiting apoptosis and necrocytosis)
-0.390558	L	reproductive	culture medium	PS-COOH	100	60000	2	female	genes expression (inhibiting apoptosis and necrocytosis)
-0.0736398	P	body	oral	PS	100	5000000	3	female	body weight
-0.0841739	P	body	oral	PS-COOH	100	5000000	3	female	body weight
-0.150416	P	body	oral	PS	100	5000000	3	unknown	fetus weight
-0.287407	P	body	oral	PS-COOH	100	5000000	3	unknown	fetus weight
-0.0280514	P	reproductive	oral	PS	100	5000000	3	female	placenta weight
-0.0147257	P	reproductive	oral	PS-COOH	100	5000000	3	female	placenta weight
-0.13927	P	reproductive	oral	PS	50	25000	4	male	sperm number
-0.347489	P	reproductive	oral	PS	50	125000	4	male	sperm number
-0.535029	P	reproductive	oral	PS	50	1250000	4	male	sperm number
-0.113861	P	reproductive	oral	PS	50	25000	4	male	sperm viability
-0.35087	P	reproductive	oral	PS	50	125000	4	male	sperm viability
-0.520145	P	reproductive	oral	PS	50	1250000	4	male	sperm viability
-0.0448308	P	reproductive	oral	PS	50	25000	4	male	testosterone
0.0146707	P	reproductive	oral	PS	50	125000	4	male	testosterone
-0.0602984	P	reproductive	oral	PS	50	1250000	4	male	testosterone
0.528798	P	immune	culture medium	PS	75	200000	1	male	ROS
-0.0305164	P	immune	culture medium	PS	75	50000	1	male	cell viability
-0.0927686	P	immune	culture medium	PS	75	100000	1	male	cell viability
-0.121903	P	immune	culture medium	PS	75	150000	1	male	cell viability
-0.200684	P	immune	culture medium	PS	75	200000	1	male	cell viability
-0.376504	P	immune	culture medium	PS	75	250000	1	male	cell viability
-0.20158	P	reproductive	oral	PS	100	10000000	3	male	sperm viability
-0.135803	P	circulatory	oral	PS	100	10000000	3	male	testosterone
0.854315	P	reproductive	oral	PS	100	10000000	3	male	MDA
-0.254833	P	reproductive	oral	PS	100	10000000	3	male	GSH
2.1814	P	reproductive	oral	PS	100	10000000	3	male	SOD
-0.272471	P	reproductive	oral	PS	100	10000000	3	male	CAT
-0.160205	P	nervous	oral	PS	100	2500000	4	male	the total distance moved (OFT)
-0.0749295	P	nervous	oral	PS	100	2500000	5	male	the total distance moved (OFT)
0.127932	P	circulatory	oral	PS	80	150000	4	male	other organs' weights/coefficents
-0.00136245	P	circulatory	oral	PS	80	300000	4	male	other organs' weights/coefficents
-0.0546652	P	circulatory	oral	PS	80	600000	4	male	other organs' weights/coefficents
-0.0154014	P	digestive	oral	PS	80	150000	4	male	liver coefficient
-0.125213	P	digestive	oral	PS	80	300000	4	male	liver coefficient
-0.0767306	P	digestive	oral	PS	80	600000	4	male	liver coefficient
0.55135	P	circulatory	oral	PS	80	150000	4	male	MDA
0.689983	P	circulatory	oral	PS	80	300000	4	male	MDA
0.908868	P	circulatory	oral	PS	80	600000	4	male	MDA
-0.1525	P	circulatory	oral	PS	80	150000	4	male	SOD
0.179587	P	circulatory	oral	PS	80	300000	4	male	SOD
0.529191	P	circulatory	oral	PS	80	600000	4	male	SOD
2.56133	P	nervous	oral	PS	50	6250000	5	male	fluorescent intensity
4.17697	P	digestive	oral	PS	50	6250000	5	male	fluorescent intensity
4.20523	P	digestive	oral	PS	50	6250000	5	male	fluorescent intensity
3.23435	P	excretory	oral	PS	50	6250000	5	male	fluorescent intensity
3.1883	P	reproductive	oral	PS	50	6250000	5	male	fluorescent intensity
3.23423	P	circulatory	oral	PS	50	6250000	5	male	fluorescent intensity
0.0775435	P	circulatory	oral	PS	50	6250000	5	male	IL-1β
0.123858	P	circulatory	oral	PS	50	6250000	5	male	IL-6
0.106753	P	circulatory	oral	PS	50	6250000	5	male	TNF-α
-0.184571	L	nervous	culture medium	PS	50	200000	1	male	cell viability
-0.485493	L	nervous	culture medium	PS	50	400000	1	male	cell viability
-1.46119	L	nervous	culture medium	PS	50	800000	1	male	cell viability
-0.113399	L	nervous	culture medium	PS	50	200000	1	male	cell viability
-0.602104	L	nervous	culture medium	PS	50	400000	1	male	cell viability
-1.86563	L	nervous	culture medium	PS	50	800000	1	male	cell viability
0.275125	P	circulatory	oral	PS	100	6250000	2	male	TG
0.308846	P	circulatory	oral	ultraviolet (UV) aging PS	100	6250000	2	male	TG
0.13093	P	circulatory	oral	PS	100	6250000	2	male	TC
0.234539	P	circulatory	oral	ultraviolet (UV) aging PS	100	6250000	2	male	TC
-0.285324	P	digestive	oral	PS	100	6250000	2	male	TG
-0.380241	P	digestive	oral	ultraviolet (UV) aging PS	100	6250000	2	male	TG
0.13068	P	digestive	oral	PS	100	6250000	2	male	TC
0.219087	P	digestive	oral	ultraviolet (UV) aging PS	100	6250000	2	male	TC
-0.802869	P	digestive	oral	PS	80	12500000	3	male	genes expression (inhibiting apoptosis and necrocytosis)
0.222967	P	digestive	oral	PS	80	12500000	3	male	genes expression (promoting apoptosis and necrocytosis)
0.197244	P	digestive	oral	PS	80	12500000	3	male	genes expression (promoting apoptosis and necrocytosis)
-0.297384	P	body	oral	PS	80	10000000	4	male	body weight
0.438053	P	nervous	oral	PS	80	10000000	4	male	AChE activity
-1.29655	P	nervous	oral	PS	80	10000000	4	male	GABA
1.55418	P	circulatory	oral	PS	80	10000000	4	male	AChE activity
-1.18678	P	circulatory	oral	PS	80	10000000	4	male	GABA
0.114959	P	reproductive	oral	PS	95.42	25000	3	female	SOD
-0.0607412	P	reproductive	oral	PS	95.42	25000	3	female	MDA
-0.424433	P	reproductive	oral	PS	25	10000000	4	male	testosterone
-0.520142	P	reproductive	oral	PS	50	10000000	4	male	testosterone
-0.47878	P	reproductive	oral	PS	100	10000000	4	male	testosterone
1.07983	P	reproductive	oral	PS	25	10000000	4	male	ROS
1.39758	P	reproductive	oral	PS	50	10000000	4	male	ROS
1.08246	P	reproductive	oral	PS	100	10000000	4	male	ROS
1.04743	P	reproductive	oral	PS	25	10000000	4	male	MDA
1.20877	P	reproductive	oral	PS	50	10000000	4	male	MDA
1.05125	P	reproductive	oral	PS	100	10000000	4	male	MDA
0.66635	P	reproductive	oral	PS	25	10000000	4	male	genes expression (promoting apoptosis and necrocytosis)
0.712448	P	reproductive	oral	PS	50	10000000	4	male	genes expression (promoting apoptosis and necrocytosis)
0.797268	P	reproductive	oral	PS	100	10000000	4	male	genes expression (promoting apoptosis and necrocytosis)
0.395022	P	reproductive	oral	PS	25	10000000	4	male	genes expression (promoting apoptosis and necrocytosis)
0.275832	P	reproductive	oral	PS	50	10000000	4	male	genes expression (promoting apoptosis and necrocytosis)
0.521076	P	reproductive	oral	PS	100	10000000	4	male	genes expression (promoting apoptosis and necrocytosis)
0.821555	P	reproductive	oral	PS	25	10000000	4	male	TNF-α
1.10344	P	reproductive	oral	PS	50	10000000	4	male	TNF-α
1.24589	P	reproductive	oral	PS	100	10000000	4	male	TNF-α
1.05891	P	reproductive	oral	PS	25	10000000	4	male	IL-6
1.08618	P	reproductive	oral	PS	50	10000000	4	male	IL-6
1.47084	P	reproductive	oral	PS	100	10000000	4	male	IL-6
0.767313	P	reproductive	oral	PS	25	10000000	4	male	IL-1β
0.811458	P	reproductive	oral	PS	50	10000000	4	male	IL-1β
0.787263	P	reproductive	oral	PS	100	10000000	4	male	IL-1β
1.42497	P	digestive	oral	PS	100	5000000	3	unknown	cell apoptosis
1.89324	P	digestive	oral	PS-COOH	100	5000000	3	unknown	cell apoptosis
2.05749	P	digestive	oral	PS-NH2	100	5000000	3	unknown	cell apoptosis
0.953656	P	excretory	oral	PS	100	3125000	4	male	TG
0.587734	P	excretory	oral	PS	100	3125000	4	male	TC
0.386769	P	excretory	oral	PS	100	3125000	4	male	IL-6
-0.76112	P	excretory	oral	PS	100	3125000	4	male	IL-10
-0.721669	P	excretory	oral	PS	100	3125000	4	male	IL-1β
0.997798	P	excretory	oral	PS	100	3125000	4	male	TNF-α
-0.302585	P	excretory	oral	PS	100	3125000	4	male	SOD
-0.247011	P	excretory	oral	PS	100	3125000	4	male	CAT
0.387771	P	excretory	oral	PS	100	3125000	4	male	MDA
-0.131335	L	reproductive	culture medium	PS	20	50000	1	unknown	cell viability
-0.316408	L	reproductive	culture medium	PS	20	100000	1	unknown	cell viability
-0.810694	L	reproductive	culture medium	PS	20	150000	1	unknown	cell viability
3.42003	L	reproductive	culture medium	PS	20	50000	1	unknown	fluorescent intensity
3.96076	L	reproductive	culture medium	PS	20	100000	1	unknown	fluorescent intensity
4.93091	L	reproductive	culture medium	PS	20	150000	1	unknown	fluorescent intensity
0.472526	L	reproductive	culture medium	PS	20	50000	1	unknown	ROS
1.06637	L	reproductive	culture medium	PS	20	100000	1	unknown	ROS
1.76412	L	reproductive	culture medium	PS	20	150000	1	unknown	ROS
0.180391	L	reproductive	culture medium	PS	20	50000	1	unknown	MDA
0.452516	L	reproductive	culture medium	PS	20	100000	1	unknown	MDA
0.691182	L	reproductive	culture medium	PS	20	150000	1	unknown	MDA
-0.00474376	L	reproductive	culture medium	PS	20	50000	1	unknown	SOD
-0.0631882	L	reproductive	culture medium	PS	20	100000	1	unknown	SOD
-0.125084	L	reproductive	culture medium	PS	20	150000	1	unknown	SOD
-0.00996121	L	reproductive	culture medium	PS	20	50000	1	unknown	GSH
-0.211902	L	reproductive	culture medium	PS	20	100000	1	unknown	GSH
-0.680015	L	reproductive	culture medium	PS	20	150000	1	unknown	GSH
0.419384	L	reproductive	culture medium	PS	20	50000	1	unknown	cell apoptosis
1.49595	L	reproductive	culture medium	PS	20	100000	1	unknown	cell apoptosis
1.93894	L	reproductive	culture medium	PS	20	150000	1	unknown	cell apoptosis
-0.137809	L	reproductive	culture medium	PS	20	50000	1	unknown	genes expression (inhibiting apoptosis and necrocytosis)
-0.436774	L	reproductive	culture medium	PS	20	100000	1	unknown	genes expression (inhibiting apoptosis and necrocytosis)
-0.568433	L	reproductive	culture medium	PS	20	150000	1	unknown	genes expression (inhibiting apoptosis and necrocytosis)
0.299569	L	reproductive	culture medium	PS	20	50000	1	unknown	genes expression (promoting apoptosis and necrocytosis)
0.440362	L	reproductive	culture medium	PS	20	100000	1	unknown	genes expression (promoting apoptosis and necrocytosis)
0.610603	L	reproductive	culture medium	PS	20	150000	1	unknown	genes expression (promoting apoptosis and necrocytosis)
0.126048	L	reproductive	culture medium	PS	20	50000	1	unknown	genes expression (promoting apoptosis and necrocytosis)
0.234201	L	reproductive	culture medium	PS	20	100000	1	unknown	genes expression (promoting apoptosis and necrocytosis)
0.489536	L	reproductive	culture medium	PS	20	150000	1	unknown	genes expression (promoting apoptosis and necrocytosis)
-0.0498108	L	reproductive	culture medium	PS	20	40000	1	unknown	cell viability
-0.0542166	L	reproductive	culture medium	PS	20	80000	1	unknown	cell viability
-0.111188	L	reproductive	culture medium	PS	20	120000	1	unknown	cell viability
-0.573568	L	reproductive	culture medium	PS	20	160000	1	unknown	cell viability
-0.0172537	P	body	oral	PS	80	625000	5	unknown	body weight
-0.0363265	P	body	oral	PS	80	1875000	5	unknown	body weight
-0.0271282	P	body	oral	PS	80	625000	5	unknown	body weight
-0.0189556	P	body	oral	PS	80	1875000	5	unknown	body weight
0.0589829	P	digestive	oral	PS	80	625000	3	unknown	liver coefficient
-0.0347476	P	digestive	oral	PS	80	1875000	3	unknown	liver coefficient
0.0669027	P	circulatory	oral	PS	80	625000	3	unknown	other organs' weights/coefficents
0	P	circulatory	oral	PS	80	1875000	3	unknown	other organs' weights/coefficents
0.0120003	P	excretory	oral	PS	80	625000	3	unknown	other organs' weights/coefficents
-0.00126548	P	excretory	oral	PS	80	1875000	3	unknown	other organs' weights/coefficents
0.508686	P	circulatory	oral	PS	80	625000	3	unknown	TG
0.621654	P	circulatory	oral	PS	80	1875000	3	unknown	TG
0.180669	P	digestive	oral	PS	80	625000	3	unknown	TG
0.122401	P	digestive	oral	PS	80	1875000	3	unknown	TG
-0.064747	P	circulatory	oral	PS	80	625000	3	unknown	TC
-0.144222	P	circulatory	oral	PS	80	1875000	3	unknown	TC
0.392939	P	digestive	oral	PS	80	625000	3	unknown	TC
0.828798	P	digestive	oral	PS	80	1875000	3	unknown	TC
-0.109233	P	circulatory	oral	PS	80	625000	3	unknown	SOD
-0.171299	P	circulatory	oral	PS	80	1875000	3	unknown	SOD
-0.210486	P	digestive	oral	PS	80	625000	3	unknown	SOD
-0.225712	P	digestive	oral	PS	80	1875000	3	unknown	SOD
0.568331	P	circulatory	oral	PS	80	625000	3	unknown	MDA
0.879246	P	circulatory	oral	PS	80	1875000	3	unknown	MDA
0.45296	P	digestive	oral	PS	80	625000	3	unknown	MDA
0.425359	P	digestive	oral	PS	80	1875000	3	unknown	MDA
0.0702231	P	body	parenteral	PS	41.54	10000	2	female	body weight
2.07e-05	P	body	parenteral	PS	41.54	50000	2	female	body weight
0.218463	P	digestive	parenteral	PS	41.54	10000	2	female	liver weight
0.0243332	P	digestive	parenteral	PS	41.54	50000	2	female	liver weight
0.153186	P	digestive	parenteral	PS	41.54	10000	2	female	liver coefficient
0.024634	P	digestive	parenteral	PS	41.54	50000	2	female	liver coefficient
0.0243265	P	digestive	parenteral	PS	41.54	10000	2	female	TC
0.0514836	P	digestive	parenteral	PS	41.54	50000	2	female	TC
0.252068	P	digestive	parenteral	PS	41.54	10000	2	female	TG
0.198212	P	digestive	parenteral	PS	41.54	50000	2	female	TG
0.306197	P	circulatory	parenteral	PS	41.54	10000	2	female	TC
-0.187671	P	circulatory	parenteral	PS	41.54	50000	2	female	TC
0.0349694	P	circulatory	parenteral	PS	41.54	10000	2	female	TG
-0.0287768	P	circulatory	parenteral	PS	41.54	50000	2	female	TG
0.330015	P	circulatory	parenteral	PS	41.54	10000	2	female	ALT
0.0428739	P	circulatory	parenteral	PS	41.54	50000	2	female	ALT
0.587212	P	circulatory	parenteral	PS	41.54	10000	2	female	AST
0.333504	P	circulatory	parenteral	PS	41.54	50000	2	female	AST
-0.344678	P	digestive	parenteral	PS	41.54	10000	2	female	SOD
-0.136584	P	digestive	parenteral	PS	41.54	50000	2	female	SOD
0.0968	P	digestive	parenteral	PS	41.54	10000	2	female	GSH
0.274425	P	digestive	parenteral	PS	41.54	50000	2	female	GSH
0.119484	P	digestive	parenteral	PS	41.54	10000	2	female	MDA
0.246499	P	digestive	parenteral	PS	41.54	50000	2	female	MDA
0.190655	P	circulatory	parenteral	PS	41.54	10000	2	female	IL-1β
-0.006767	P	circulatory	parenteral	PS	41.54	50000	2	female	IL-1β
0.124178	P	circulatory	parenteral	PS	41.54	10000	2	female	TNF-α
-0.0255479	P	circulatory	parenteral	PS	41.54	50000	2	female	TNF-α
0.071797	P	digestive	parenteral	PS	41.54	10000	2	female	TNF-α
-0.000414696	P	digestive	parenteral	PS	41.54	50000	2	female	TNF-α
0.425455	P	digestive	parenteral	PS	41.54	10000	2	female	IL-1β
-0.441448	P	digestive	parenteral	PS	41.54	50000	2	female	IL-1β
-0.152481	P	body	oral	PS	50	25000000	3	male	body weight
-0.178902	P	excretory	oral	PS	50	25000000	3	male	other organs' weights/coefficents
0.0460756	P	excretory	oral	PS	50	25000000	3	male	CAT
0.0944222	P	excretory	oral	PS	50	25000000	3	male	SOD
0.520316	P	excretory	oral	PS	50	25000000	3	male	GSH
0.0996168	P	excretory	oral	PS	50	25000000	3	male	MDA
0.327168	P	excretory	oral	PS	50	25000000	3	male	IL-6
1.17868	P	excretory	oral	PS	50	25000000	3	male	IL-10
0.128017	P	excretory	oral	PS	50	25000000	3	male	TNF-α
-0.027431	P	body	oral	PS	50	25000	4	male	body weight
0.081689	P	body	oral	PS	50	125000	4	male	body weight
0.102171	P	body	oral	PS	50	1250000	4	male	body weight
-0.147845	P	nervous	oral	PS	50	25000	4	male	the total distance moved (OFT)
-0.035389	P	nervous	oral	PS	50	125000	4	male	the total distance moved (OFT)
-0.064248	P	nervous	oral	PS	50	1250000	4	male	the total distance moved (OFT)
-0.199336	P	nervous	oral	PS	50	25000	4	male	the distance in center areas (OFT)
-0.185549	P	nervous	oral	PS	50	125000	4	male	the distance in center areas (OFT)
-0.0358645	P	nervous	oral	PS	50	1250000	4	male	the distance in center areas (OFT)
0.0550723	P	digestive	oral	PS	50	25000	4	male	IL-1β
0.0713979	P	digestive	oral	PS	50	125000	4	male	IL-1β
-0.0754702	P	digestive	oral	PS	50	1250000	4	male	IL-1β
-0.0545289	P	digestive	oral	PS	50	25000	4	male	IL-6
-0.162942	P	digestive	oral	PS	50	125000	4	male	IL-6
0.0788758	P	digestive	oral	PS	50	1250000	4	male	IL-6
0.120607	P	digestive	oral	PS	50	25000	4	male	TNF-α
0.0982882	P	digestive	oral	PS	50	125000	4	male	TNF-α
0.075088	P	digestive	oral	PS	50	1250000	4	male	TNF-α
0.0748002	P	nervous	oral	PS	50	25000	4	male	IL-1β
-0.0122891	P	nervous	oral	PS	50	125000	4	male	IL-1β
-0.0402251	P	nervous	oral	PS	50	1250000	4	male	IL-1β
0.119275	P	nervous	oral	PS	50	25000	4	male	IL-6
0.062866	P	nervous	oral	PS	50	125000	4	male	IL-6
0.083685	P	nervous	oral	PS	50	1250000	4	male	IL-6
-0.104128	P	nervous	oral	PS	50	25000	4	male	TNF-α
0.00288634	P	nervous	oral	PS	50	125000	4	male	TNF-α
-0.122209	P	nervous	oral	PS	50	1250000	4	male	TNF-α
-0.0490439	P	respiratory	oral	PS	50	25000	4	male	IL-1β
0.1249	P	respiratory	oral	PS	50	125000	4	male	IL-1β
0.0884023	P	respiratory	oral	PS	50	1250000	4	male	IL-1β
0.0812854	P	respiratory	oral	PS	50	25000	4	male	IL-6
0.0336194	P	respiratory	oral	PS	50	125000	4	male	IL-6
-0.00542002	P	respiratory	oral	PS	50	1250000	4	male	IL-6
-0.148607	P	respiratory	oral	PS	50	25000	4	male	TNF-α
-0.0257544	P	respiratory	oral	PS	50	125000	4	male	TNF-α
-0.0354492	P	respiratory	oral	PS	50	1250000	4	male	TNF-α
-0.00930617	P	digestive	oral	PS	50	25000	4	male	IL-1β
-0.0368675	P	digestive	oral	PS	50	125000	4	male	IL-1β
0.0277199	P	digestive	oral	PS	50	1250000	4	male	IL-1β
-0.0507223	P	digestive	oral	PS	50	25000	4	male	IL-6
0.179615	P	digestive	oral	PS	50	125000	4	male	IL-6
0.120321	P	digestive	oral	PS	50	1250000	4	male	IL-6
0.0472837	P	digestive	oral	PS	50	25000	4	male	TNF-α
-0.0554167	P	digestive	oral	PS	50	125000	4	male	TNF-α
0.111266	P	digestive	oral	PS	50	1250000	4	male	TNF-α
0.139527	P	circulatory	oral	PS	50	25000	4	male	IL-1β
-0.153227	P	circulatory	oral	PS	50	125000	4	male	IL-1β
-0.265142	P	circulatory	oral	PS	50	1250000	4	male	IL-1β
-0.173936	P	circulatory	oral	PS	50	25000	4	male	IL-6
-0.216119	P	circulatory	oral	PS	50	125000	4	male	IL-6
0.0659484	P	circulatory	oral	PS	50	1250000	4	male	IL-6
-0.0199146	P	circulatory	oral	PS	50	25000	4	male	TNF-α
0.0198504	P	circulatory	oral	PS	50	125000	4	male	TNF-α
-0.0210459	P	circulatory	oral	PS	50	1250000	4	male	TNF-α
-0.00829423	P	body	oral	PS	100	10000000	3	male	body weight
-0.0408913	P	body	oral	PS-COOH	100	10000000	3	male	body weight
-0.130853	P	body	oral	PS-NH2	100	10000000	3	male	body weight
-0.0432802	P	digestive	oral	PS	100	10000000	3	male	liver weight
-0.00710283	P	digestive	oral	PS-COOH	100	10000000	3	male	liver weight
-0.0383877	P	digestive	oral	PS-NH2	100	10000000	3	male	liver weight
-0.0416636	P	digestive	oral	PS	100	10000000	3	male	liver coefficient
-7.81e-05	P	digestive	oral	PS-COOH	100	10000000	3	male	liver coefficient
0.0201236	P	digestive	oral	PS-NH2	100	10000000	3	male	liver coefficient
-0.109482	P	circulatory	oral	PS	100	10000000	3	male	TG
-0.0929443	P	circulatory	oral	PS-COOH	100	10000000	3	male	TG
-0.0822063	P	circulatory	oral	PS-NH2	100	10000000	3	male	TG
0.0437308	P	circulatory	oral	PS	100	10000000	3	male	TC
0.151209	P	circulatory	oral	PS-COOH	100	10000000	3	male	TC
2.25338	P	circulatory	oral	PS-NH2	100	10000000	3	male	TC
0.0351718	P	circulatory	oral	PS	100	10000000	3	male	ALT
0.121386	P	circulatory	oral	PS-COOH	100	10000000	3	male	ALT
-0.145338	P	circulatory	oral	PS-NH2	100	10000000	3	male	ALT
-0.272414	P	circulatory	oral	PS	100	10000000	3	male	AST
-0.196737	P	circulatory	oral	PS-COOH	100	10000000	3	male	AST
-0.233083	P	circulatory	oral	PS-NH2	100	10000000	3	male	AST
-0.373454	P	reproductive	oral	PS	50	375000	3	male	sperm number
-0.838123	P	reproductive	oral	PS	50	1875000	3	male	sperm number
-0.20364	P	reproductive	oral	PS	90	375000	3	male	sperm number
-0.448182	P	reproductive	oral	PS	90	1875000	3	male	sperm number
-0.321111	P	reproductive	oral	PS	50	375000	3	male	sperm viability
-0.68259	P	reproductive	oral	PS	50	1875000	3	male	sperm viability
-0.17654	P	reproductive	oral	PS	90	375000	3	male	sperm viability
-0.480115	P	reproductive	oral	PS	90	1875000	3	male	sperm viability
-0.188642	P	reproductive	oral	PS	50	375000	3	male	testosterone
-0.443739	P	reproductive	oral	PS	50	1875000	3	male	testosterone
-0.0143204	P	reproductive	oral	PS	90	375000	3	male	testosterone
-0.158831	P	reproductive	oral	PS	90	1875000	3	male	testosterone
