# Supplementary figures and images for: Toxicity of nanoplastics: machine learning combined with meta-analysis
Source: Royal Society of Chemistry journal article supplement (doi:10.1039/d5nh00024f), 2025-01-01

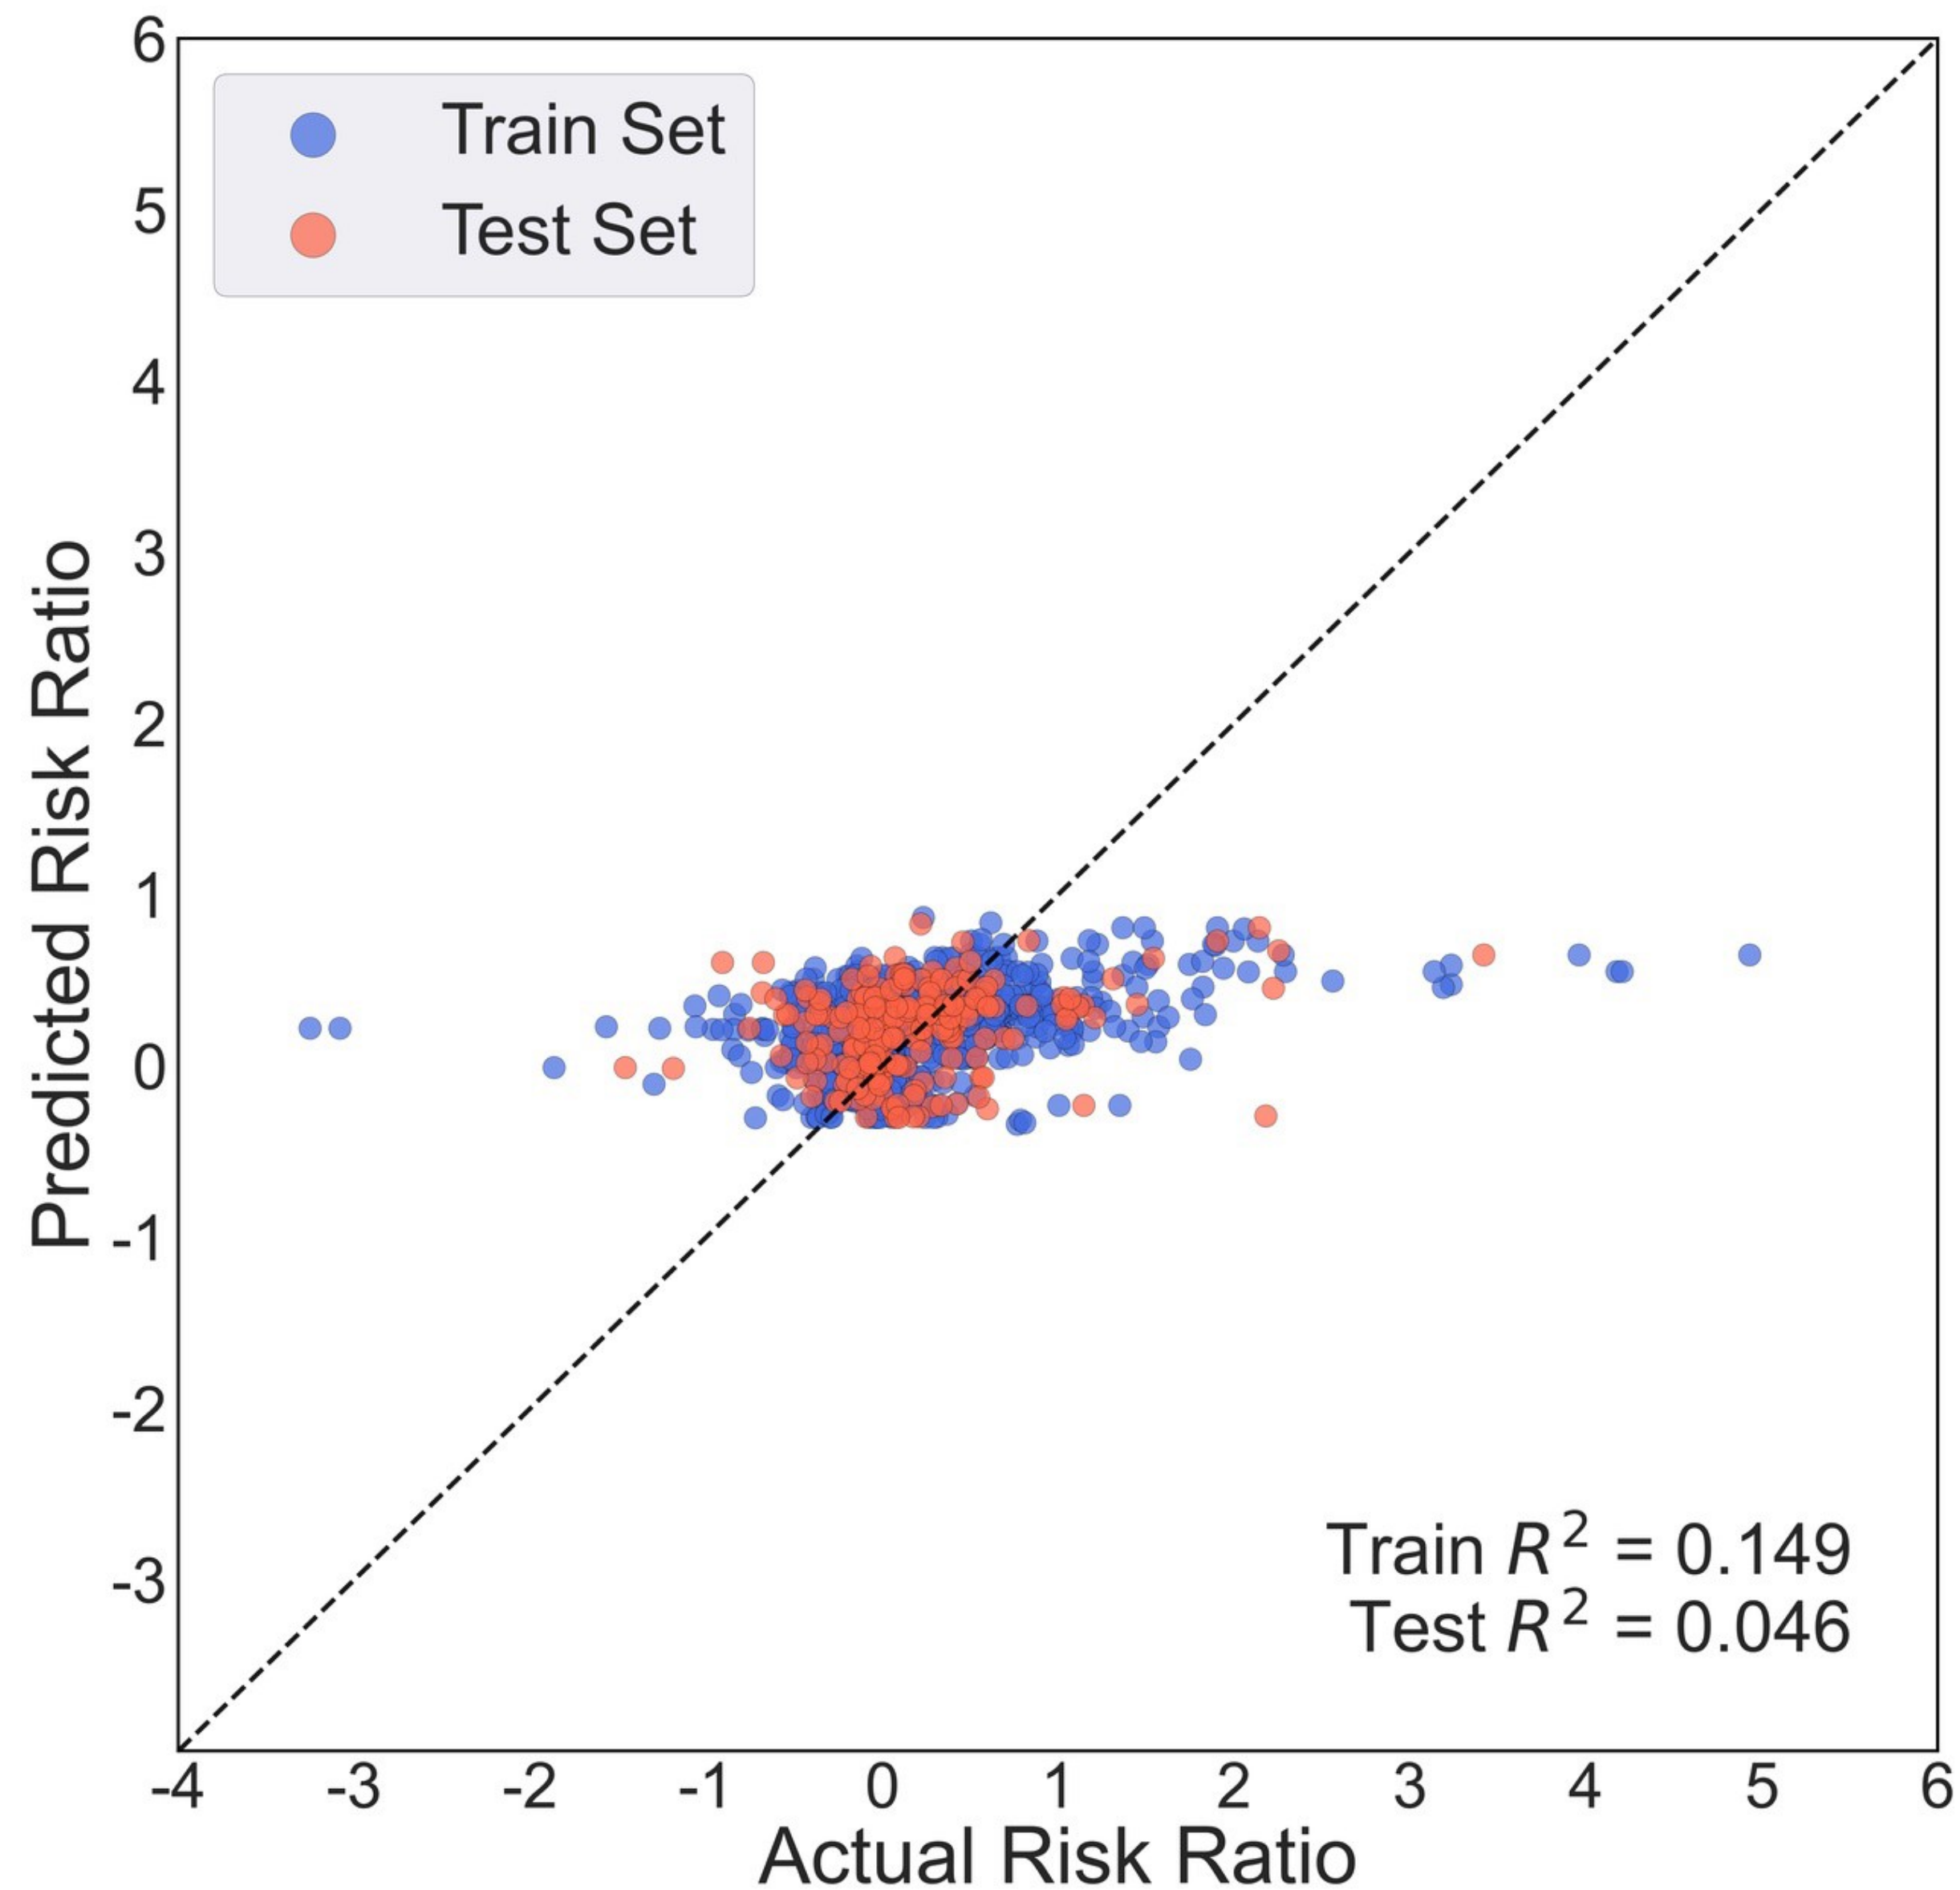

Supplement: d5nh00024f5.pdf [file d5nh00024f5.pdf]
